# Supplementary material for: New Benzimidazoles Targeting Breast Cancer: Synthesis, Pin1 Inhibition, 2D NMR Binding, and Computational Studies
Source: MDPI journal article supplement (doi:10.3390/molecules27165245), 2022-08-17

# New Benzimidazoles Targeting Breast Cancer: Synthesis, Pin1 Inhibition, 2D NMR Binding, and Computational Studies

Samira Nashaat <sup>1</sup>, Morkos A. Henen <sup>1,2,\*</sup>, Shahenda M. El-Messery <sup>1,\*</sup> and Hassan Eisa <sup>1</sup>

<sup>1</sup> Department of Pharmaceutical Organic Chemistry, Faculty of Pharmacy, Mansoura University, Mansoura P.O. Box 35516, Egypt; samiranashaat2@gmail.com (S.N.); nmr\_afpnoesy@outlook.com (H.E.)

<sup>2</sup> Department of Biochemistry and Molecular Genetics, University of Colorado Denver, Denver, CO 80204, USA

\* Correspondence: morkos.henen@ucdenver.edu (M.A.H.); selmessery@gmail.com (S.M.E.-M.); Tel./Fax: +20-50-2200242 (S.M.E.-M.)

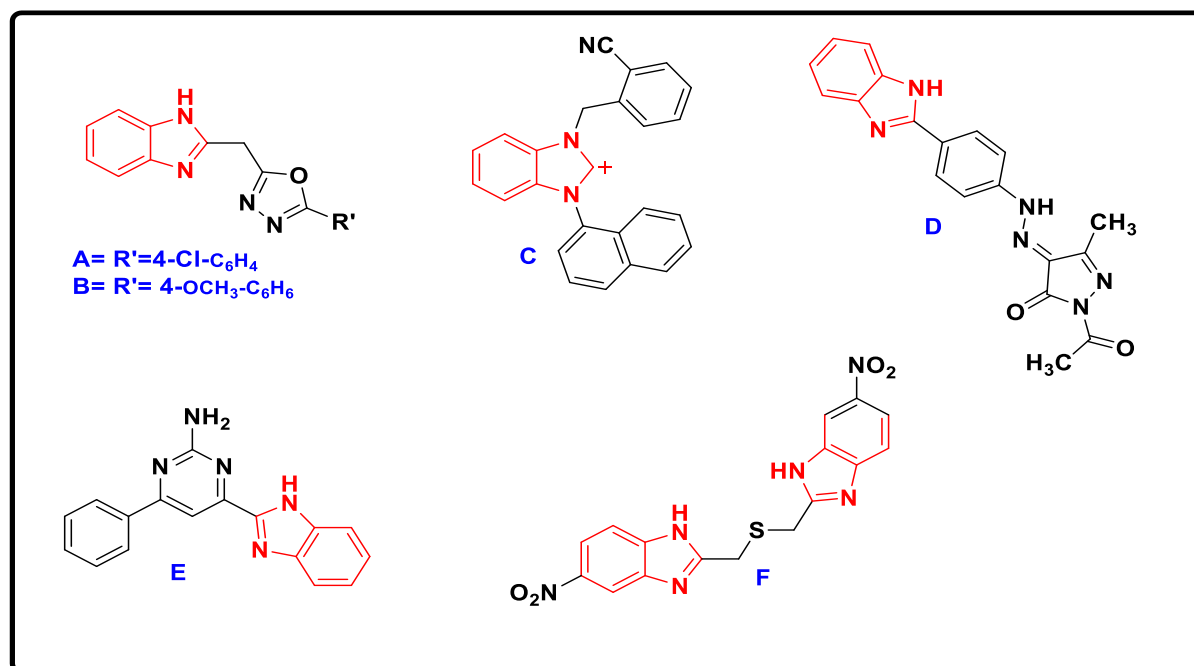

**Chart S1.** Structures of some known benzimidazoles derivatives with antiproliferative activity against breast cancer cell lines with IC<sub>50</sub> against MCF7 is >100μM.

## List of spectroscopic spectra of the compounds

| compound | <sup>1</sup> H NMR                                                                                                                                                                                                                                     | <sup>13</sup> C NMR                                                                                                                                                                         | IR                                                        |
|----------|--------------------------------------------------------------------------------------------------------------------------------------------------------------------------------------------------------------------------------------------------------|---------------------------------------------------------------------------------------------------------------------------------------------------------------------------------------------|-----------------------------------------------------------|
| 4        | δ: 3.05 (s, 6H, N(CH <sub>3</sub> ) <sub>2</sub> ), 6.78 (d, <i>J</i> =8.3 Hz, 2H, Ar-H), 7.7 (d, <i>J</i> = 8.3 Hz, 2H, Ar-H), 7.77 (d, <i>J</i> =12.6 Hz, 1H), 7.93 (d, <i>J</i> =12.6 Hz, 1H), 8.13 (s, 2H, Benz-H), 13.66 (s, 1H, NH).             |                                                                                                                                                                                             | 1349 (C-N), 1555 (C=N), 1641 (C=O), 3422 (N-H).           |
| 5        | δ: 2.88 (s, 6H, N(CH <sub>3</sub> ) <sub>2</sub> ), 2.9 (s, 2H, pyrazole-H), 4.9 (s, 1H, NH), 6.72 (d, <i>J</i> =8.2 Hz, 2H, Ar-H), 7.2 (d, <i>J</i> =8.2 Hz, 2H, Ar-H), 7.6 (s, 1H, Benz-H), 7.88 (s, 1H, Benz-H)                                     |                                                                                                                                                                                             |                                                           |
| 6        | δ: 3.06 (s, 6H, N(CH <sub>3</sub> ) <sub>2</sub> ), 6.76 (s, 2H, NH <sub>2</sub> ), 6.87 (d, <i>J</i> =8 Hz, 2H, Ar-H), 7.61 (s, 1H, pyridine-H), 7.85 (d, <i>J</i> =8 Hz, 2H, Ar-H), 8.06 (s, 2H, Benz-H).                                            |                                                                                                                                                                                             | 1610 (C=N), 2214 (C≡N), 3225 and 3356 (NH <sub>2</sub> ). |
| 7        | δ: 2.9 (d, 1H, pyrane-H), 3.11 (s, 6H, N(CH <sub>3</sub> ) <sub>2</sub> ), 4.5 (s, 2H, NH <sub>2</sub> ), 6.86 (d, <i>J</i> =8.6 Hz, 2H, Ar-H), 7.2 (d, <i>J</i> =8 Hz, 1H, pyrane-H), 7.84 (d, <i>J</i> =8.6 Hz, 2H, Ar-H), 8.06 (s, 2H, Benz-H).     | δ: 44.59 (CH <sub>3</sub> ), 68.87 (CH), 112.20 (CH), 116.88 (CH <sub>2</sub> ), 119.04 (CH), 133.78 (CH <sub>2</sub> ), 133.78 (CH <sub>2</sub> ), 154.82 (CH <sub>2</sub> ), 159.32 (CH). | 1611 (C=N), 2208 (C≡N), 3225 and 3424 (NH <sub>2</sub> ). |
| 8        | δ: 2.81 (s, 6H, N(CH <sub>3</sub> ) <sub>2</sub> ), 3.0 (d, <i>J</i> =6.5 Hz, 2H, isoxazoline-H), 5.75 (t, 1H, isoxazoline-H), 7.11 (d, <i>J</i> =8.2 Hz, 2H, Ar-H), 7.27 (d, <i>J</i> =8.2 Hz, 2H, Ar-H), 7.72 (s, 1H, Benz-H), 8.03 (s, 1H, Benz-H). |                                                                                                                                                                                             |                                                           |

|    |                                                                                                                                                                                                                                                                                                                                          |                                                                                                                                                                                                                                                                                                                                             |                   |
|----|------------------------------------------------------------------------------------------------------------------------------------------------------------------------------------------------------------------------------------------------------------------------------------------------------------------------------------------|---------------------------------------------------------------------------------------------------------------------------------------------------------------------------------------------------------------------------------------------------------------------------------------------------------------------------------------------|-------------------|
| 9  | <p><math>\delta</math>: 2.68 (s, 3H, COCH<sub>3</sub>), 6.19 (s, 2H, COCH<sub>2</sub>), 7.63 (d, <math>J</math>=8.2 Hz, 2H, Ar-H), 7.86 (s, 1H, Benz-H), 8.0 (s, 1H, Benz-H), 8.27 (d, <math>J</math>=8.2 Hz, 2H, Ar-H).</p>                                                                                                             |                                                                                                                                                                                                                                                                                                                                             | 1654, 1689 (C=O). |
| 10 | <p><math>\delta</math>: 2.02 (s, 3H, CH<sub>3</sub>), 7.09 (d, <math>J</math>=8 Hz, 2H, Ar-H), 7.2 (d, <math>J</math>=8 Hz, 2H, Ar-H), 7.4 (d, <math>J</math>=8 Hz, 2H, Ar-H), 7.46 (d, <math>J</math>=8 Hz, 2H, Ar-H), 8.95 (s, 2H, methylene-H), 8.69 (s, 1H, Benz-H), 8.86 (s, 1H, Benz-H), 9.7 (s, 1H, pyrazanobenzimidazole-H).</p> | <p><math>\delta</math>: 20.9, 102.2, 112.4, 117.1, 119.5, 124.2, 128.9, 129.9, 130.5, 131.1, 131.5, 132.1, 134.2, 138.5, 145.1, 167.3.</p>                                                                                                                                                                                                  |                   |
| 11 | <p><math>\delta</math>: 2.06 (s, 3H, CH<sub>3</sub>), 7.18 – 7.41 (m, 4H, Ar-H), 7.58 (d, <math>J</math>= 7.4 Hz, 2H, Ar-H), 7.68 (d, <math>J</math>=7.6 Hz, 2H, Ar-H), 8.13 (s, 1H, Benz-H), 8.25 (s, 1H, Benz-H), 8.85 (s, 2H, methylene-H), 8.91 (s, 1H, pyrazanobenzimidazole-H).</p>                                                |                                                                                                                                                                                                                                                                                                                                             |                   |
| 12 | <p><math>\delta</math>: 4.64 (s, 2H, CH<sub>2</sub>-Ph), 7.26-7.48 (m, 5H, Ar-H), 7.67 (d, <math>J</math>=7.2 Hz, 2H, Ar-H), 7.8 (d, <math>J</math>=7.2 Hz, 2H, Ar-H), 8.07 (s, 2H, Benz-H), 8.52 (s, 2H, methylene-H), 8.77 (s, 1H, byrazanobenzimidazole-H)</p>                                                                        | <p><math>\delta</math>: 64.73 (CH<sub>2</sub>), 101.23 (CH), 112.02 (CH), 115.08 (CH), 120.65 (CH), 123.35 (CH<sub>2</sub>), 124.97 (CH<sub>2</sub>), 127.31 (CH), 128.93 (CH), 131.08 (CH), 132.34 (CH), 136.66 (CH<sub>2</sub>), 139.54 (CH<sub>2</sub>), 140.25 (CH), 142.96 (CH<sub>2</sub>), 144.21 (CH<sub>2</sub>), 162.19 (CH).</p> |                   |

|    |                                                                                                                                                                                                                                            |  |                                                          |
|----|--------------------------------------------------------------------------------------------------------------------------------------------------------------------------------------------------------------------------------------------|--|----------------------------------------------------------|
| 13 | <p> <math>\delta</math>: 1.25 (s, 3H, CH<sub>3</sub>), 7.77 (d, <math>J</math>=7.7 Hz, 2H, Ar-H), 8.1 (d, <math>J</math>=7.7 Hz, 2H, Ar-H), 8.33 (s, 1H, Benz-H), 8.93(s, 1H, Benz-H), 9.68 (s, 1H, pyrazanobenzimidazole-H). </p>         |  |                                                          |
| 14 | <p> <math>\delta</math>: 7.19 (d, <math>J</math>=7.7 Hz, 2H, Ar-H), 7.3 (d, <math>J</math>=7.7 Hz, 2H, Ar-H), 7.74 (s, 2H, Benz-H), 8.11 (s, 1H, pyridinonobenzimidazole-H), 8.85 (s, 1H, pyridinobenzimidazole-H), 9.07 (s, 1H, OH). </p> |  | <p> 1219-1296 (C-O),1557-1642 (C=C,C=N), 3448 (OH). </p> |

# <sup>1</sup>H NMR of compound 4

<sup>1</sup>H NMR

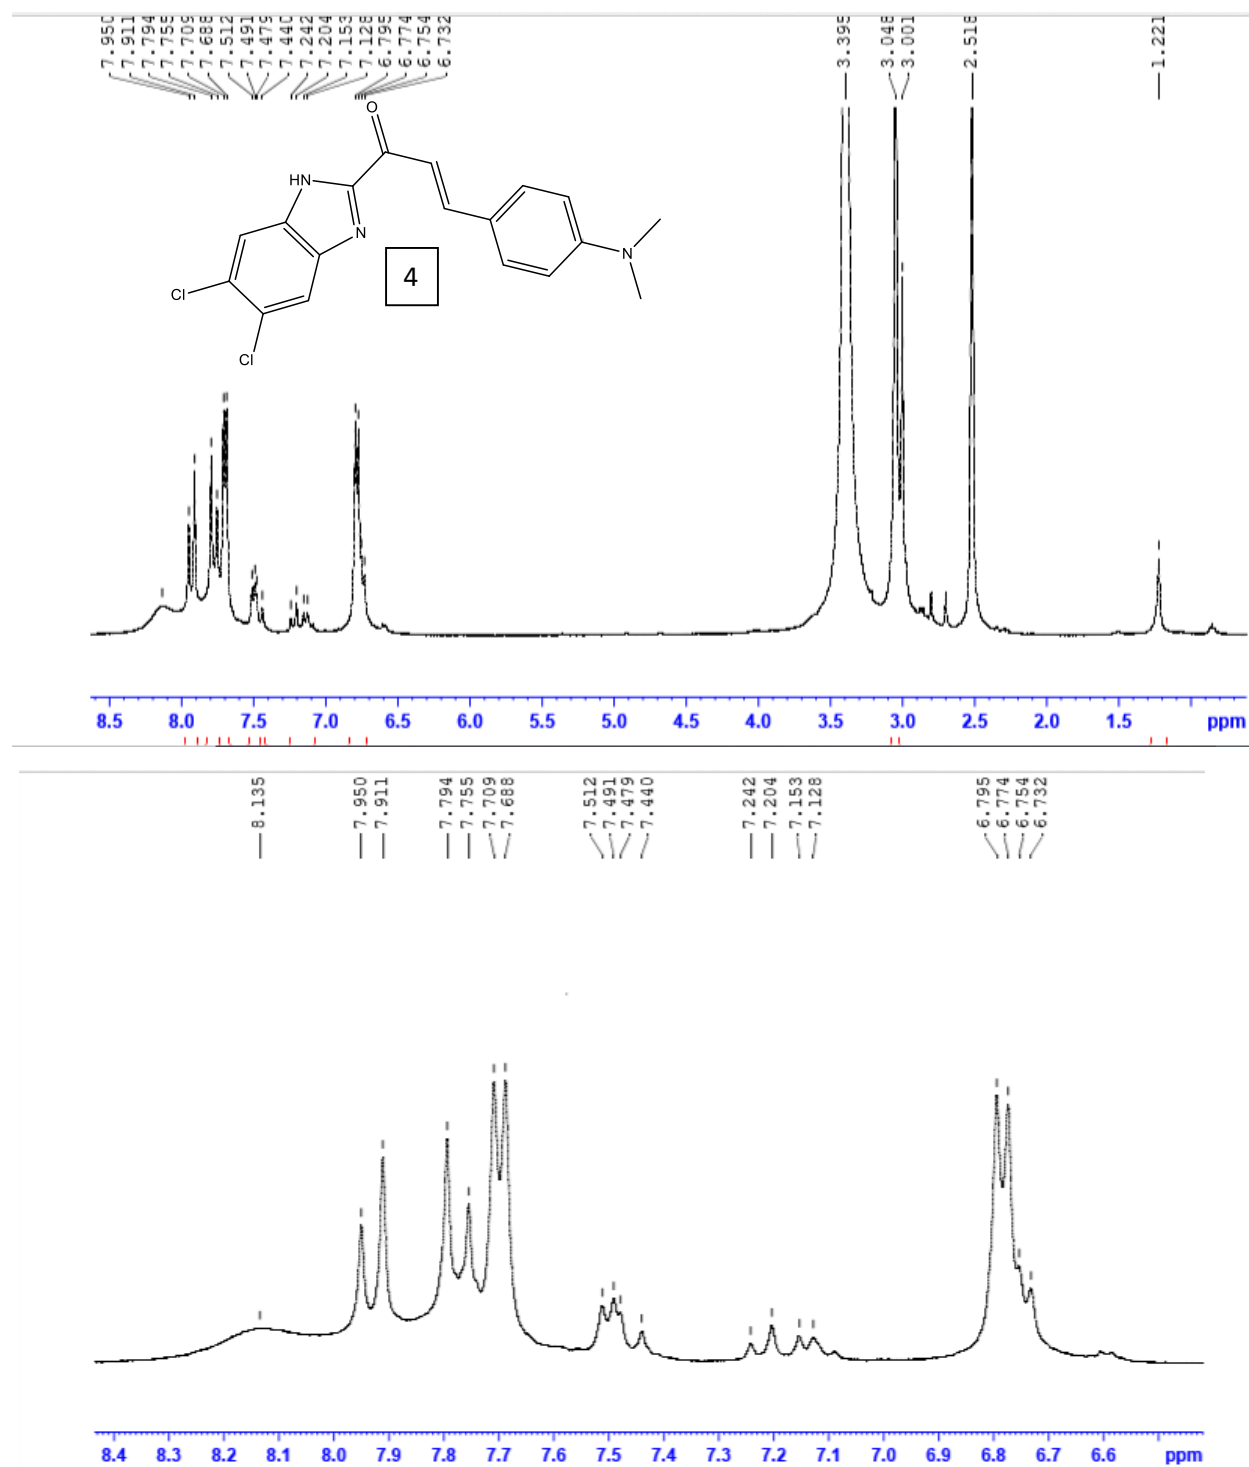

## IR of compound 4

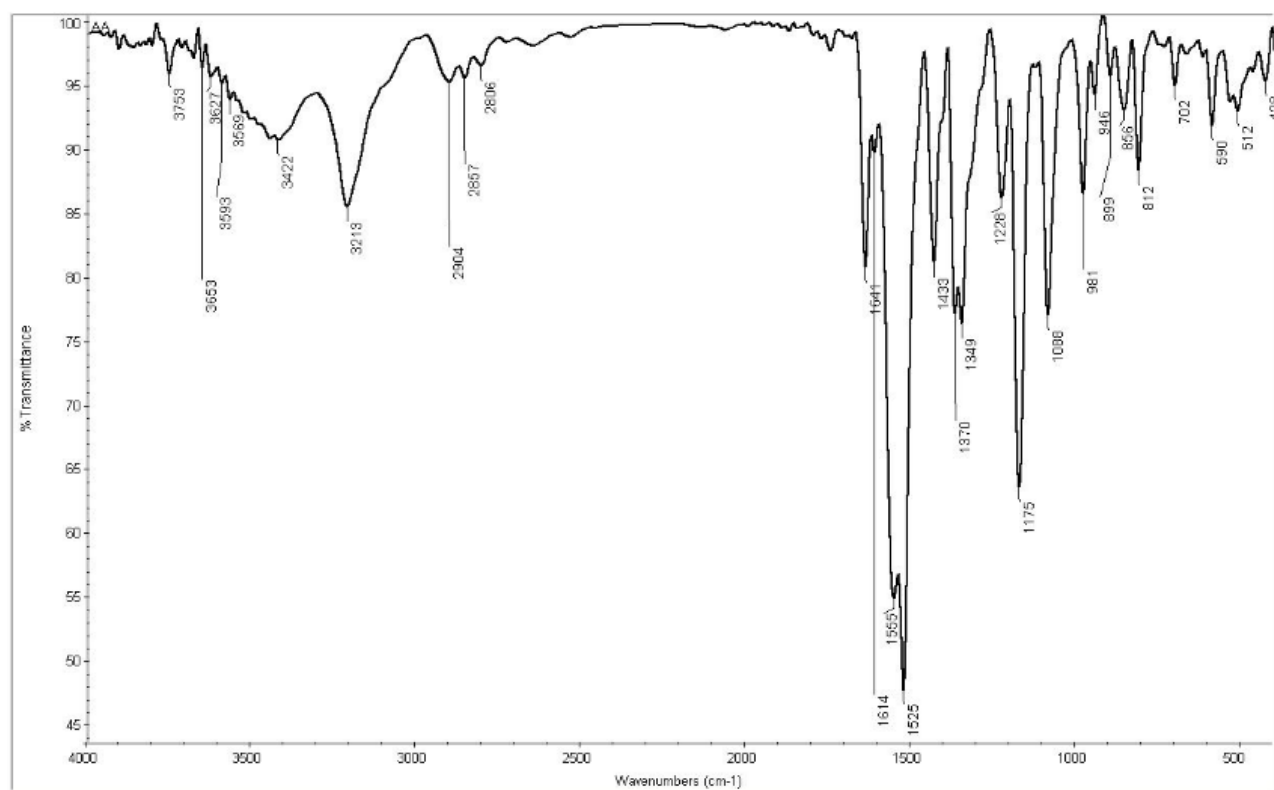

## Mass of compound 4

RT: 2.88 - 3.21 SM: 15G

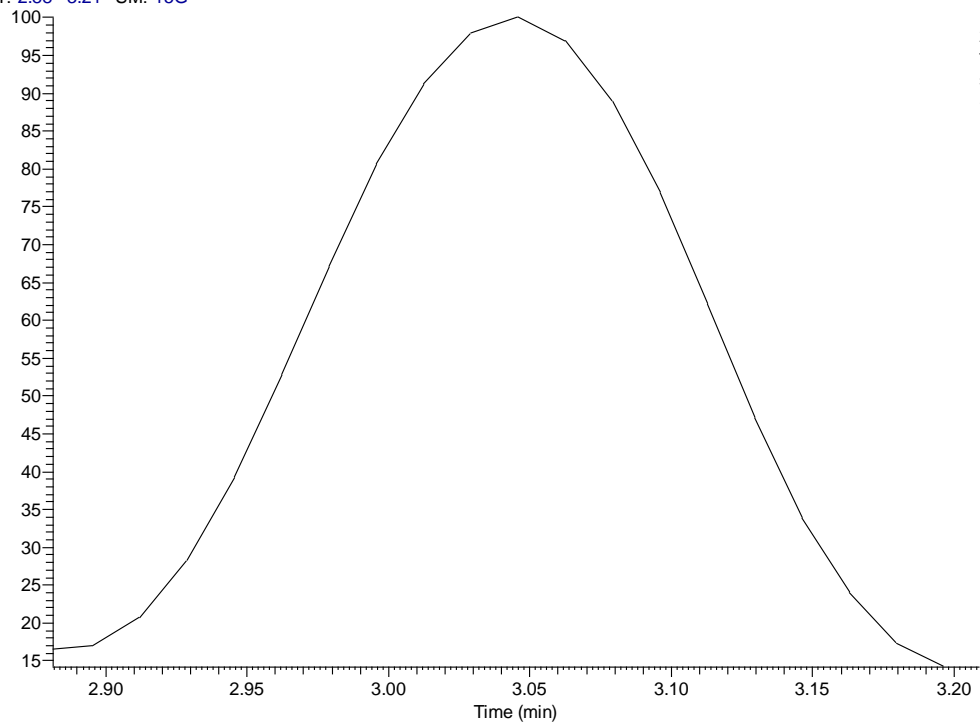

NL:  
2.45E4  
TIC MS  
samira0na  
SHAT-1

samira0naSHAT-1 #275 RT: 4.62 AV: 1 SB: 2 4.45, 4.45 NL: 2.63E2  
T: {0.0} + c EI Full ms [40.00-1000.00]

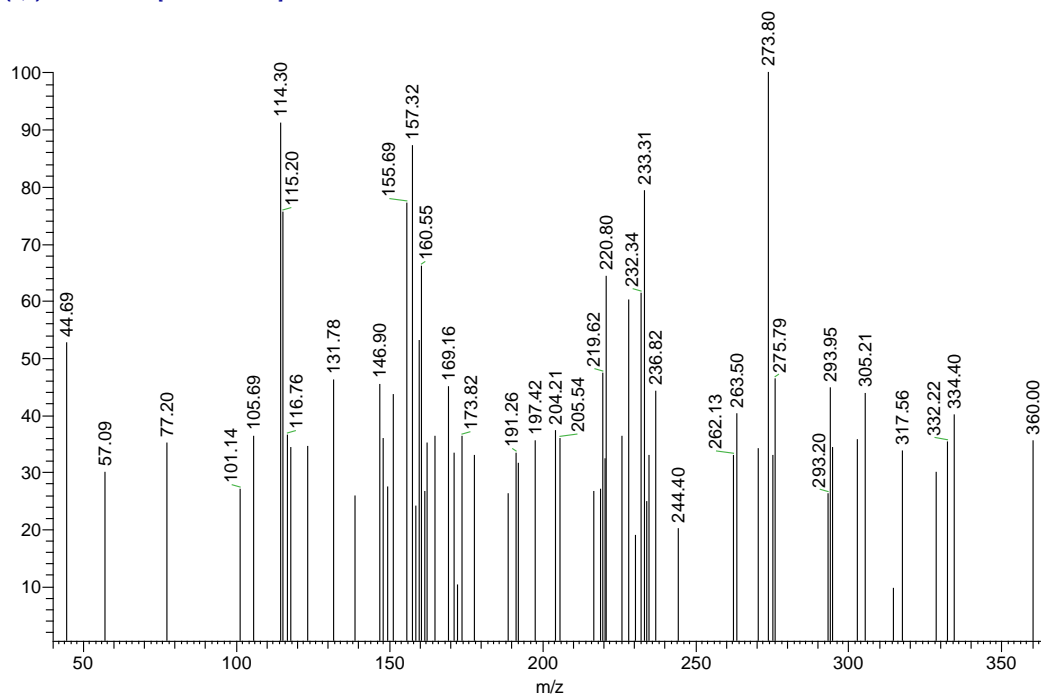

# <sup>1</sup>H NMR of compound 5

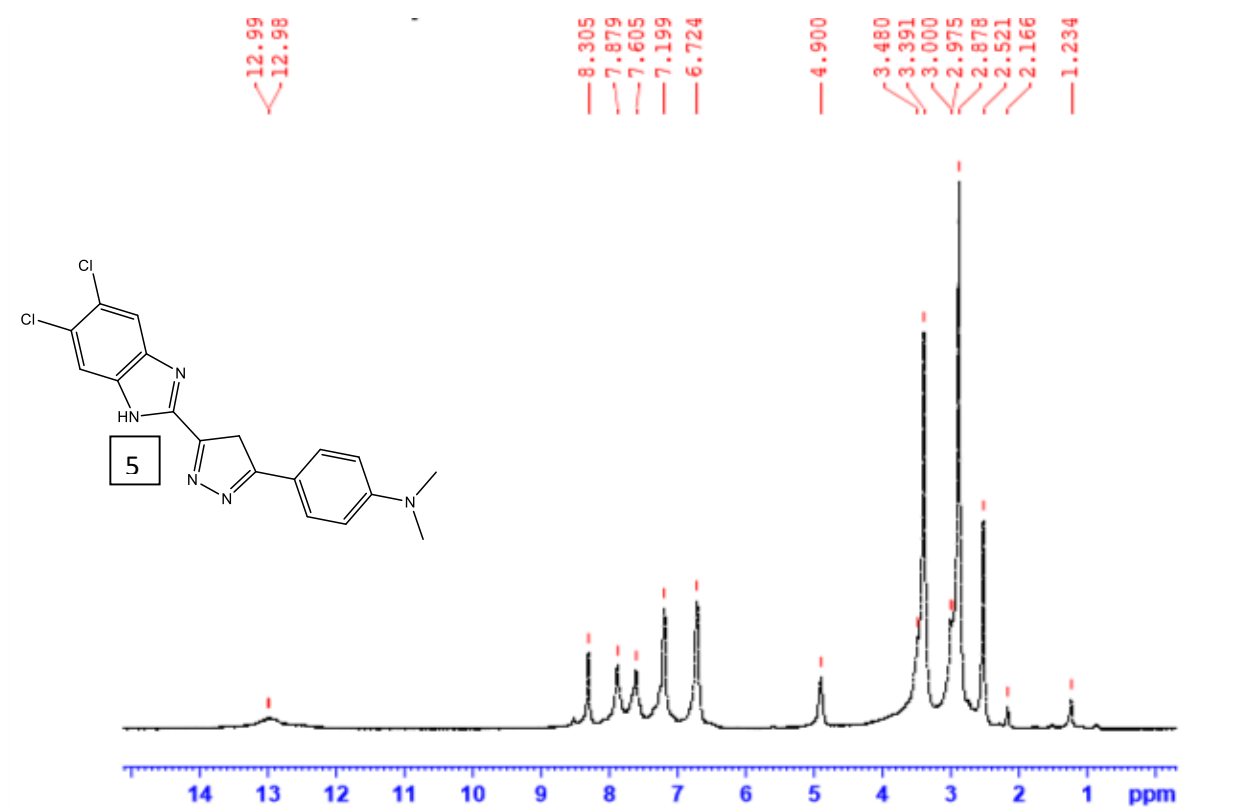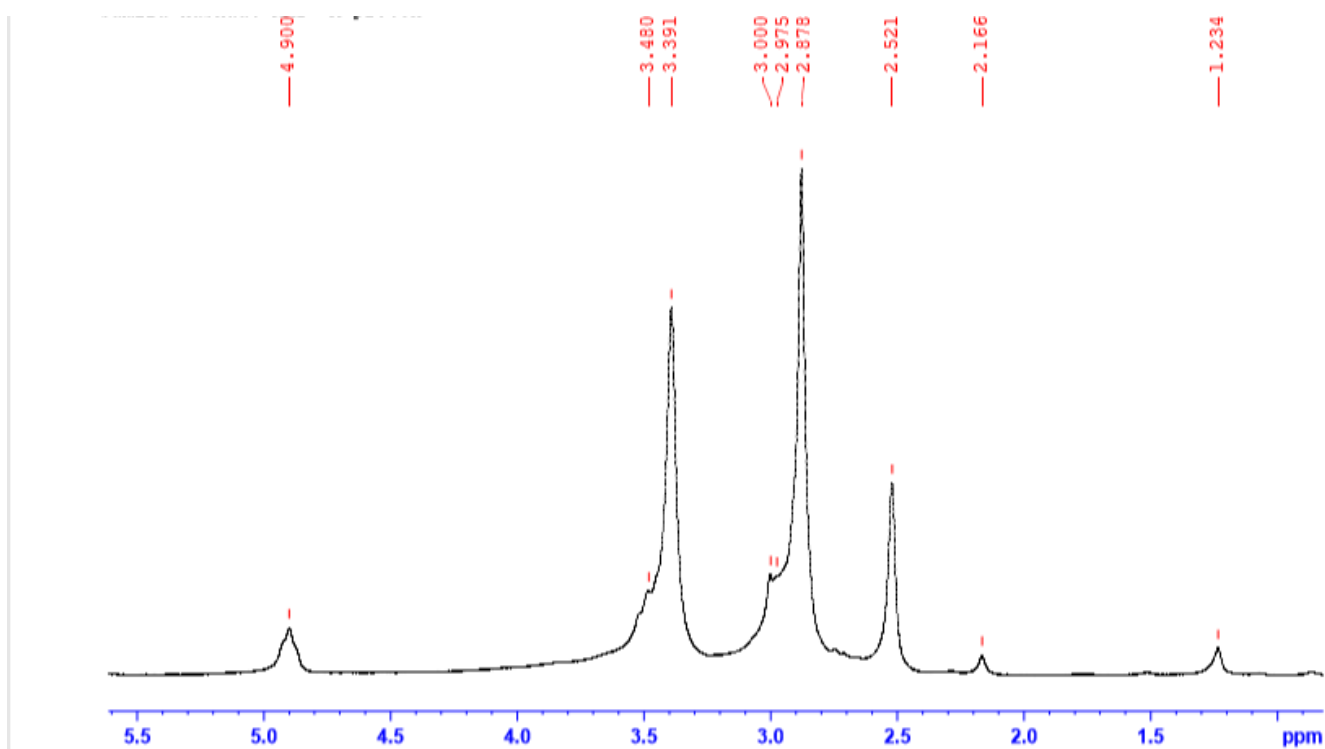



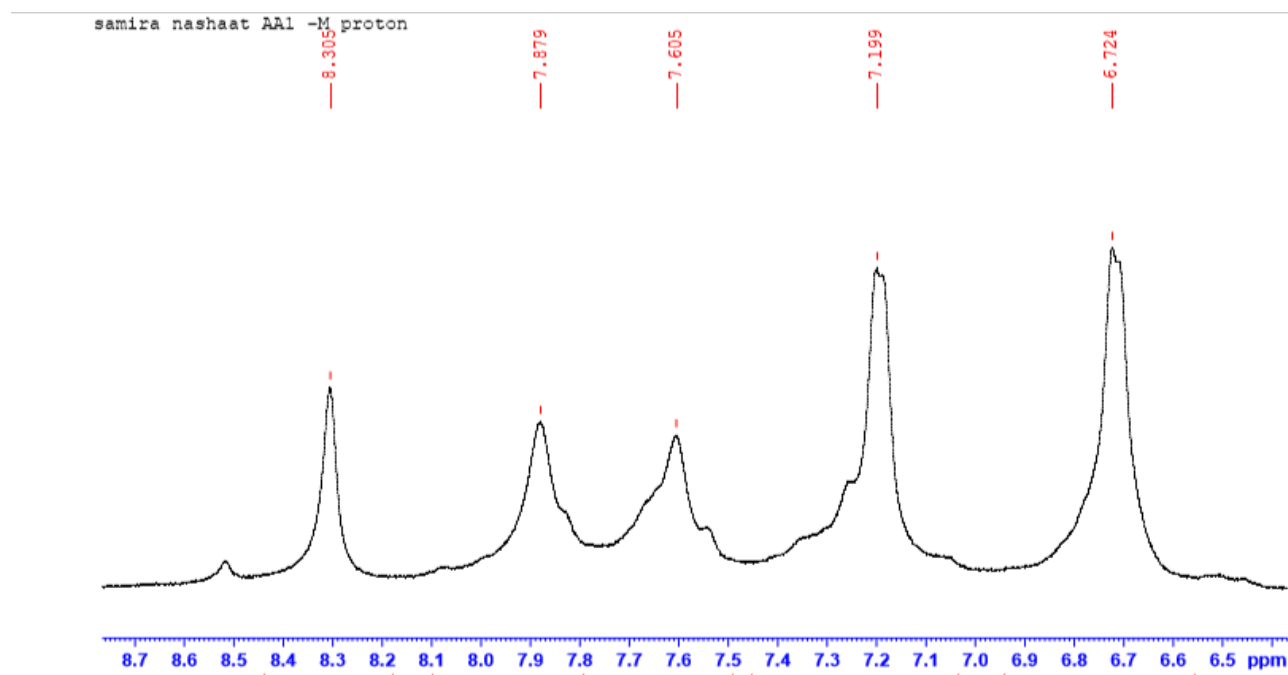

$^{13}\text{C}$  NMR of compound 5

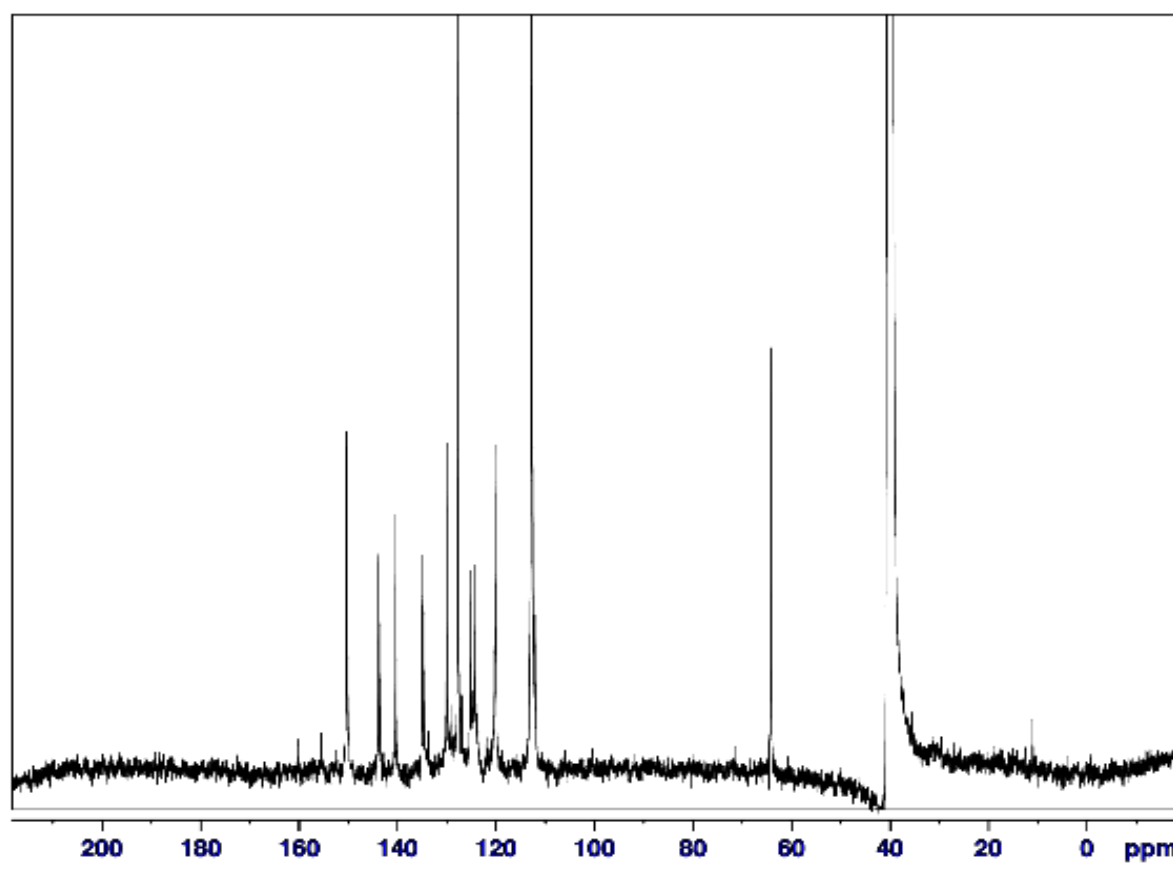

# APT of compound 5

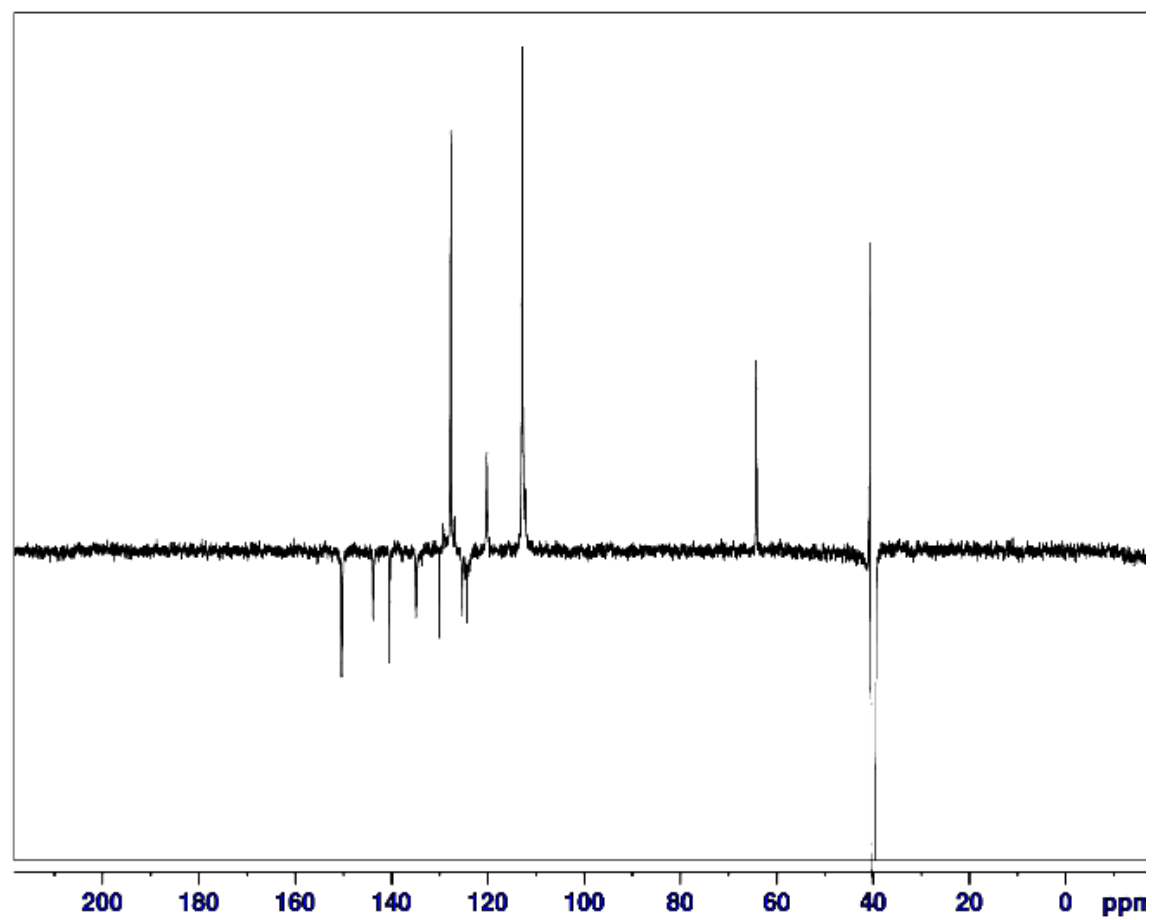

## Mass of compound 5

RT: 1.72 - 2.35 SM: 15G

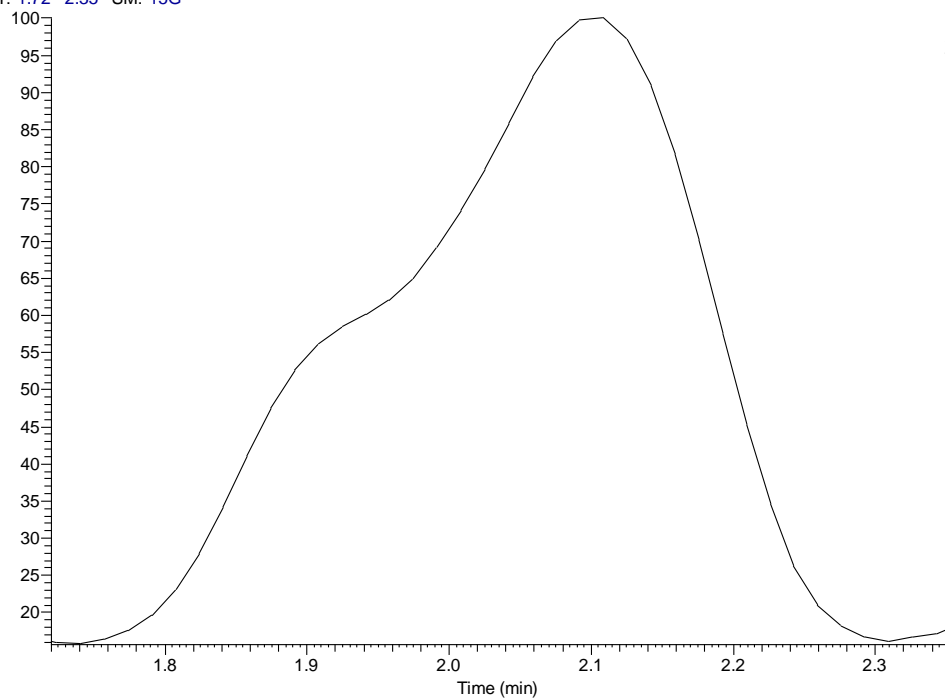

NL:  
2.17E4  
TIC MS  
samira0na  
SHAT-9

samira0naSHAT-9 #179 RT: 3.01 AV: 1 SB: 2 3.45, 3.45 NL: 4.15E2  
T: {0,0} + c EI Full ms [40.00-1000.00]

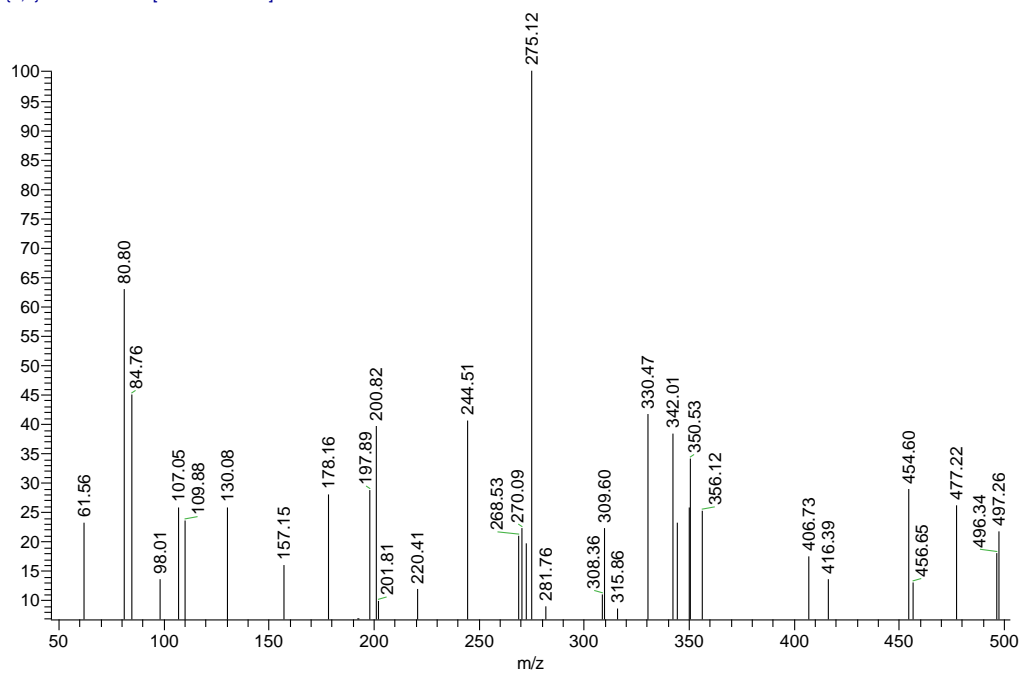

# <sup>1</sup>H NMR of compound 6

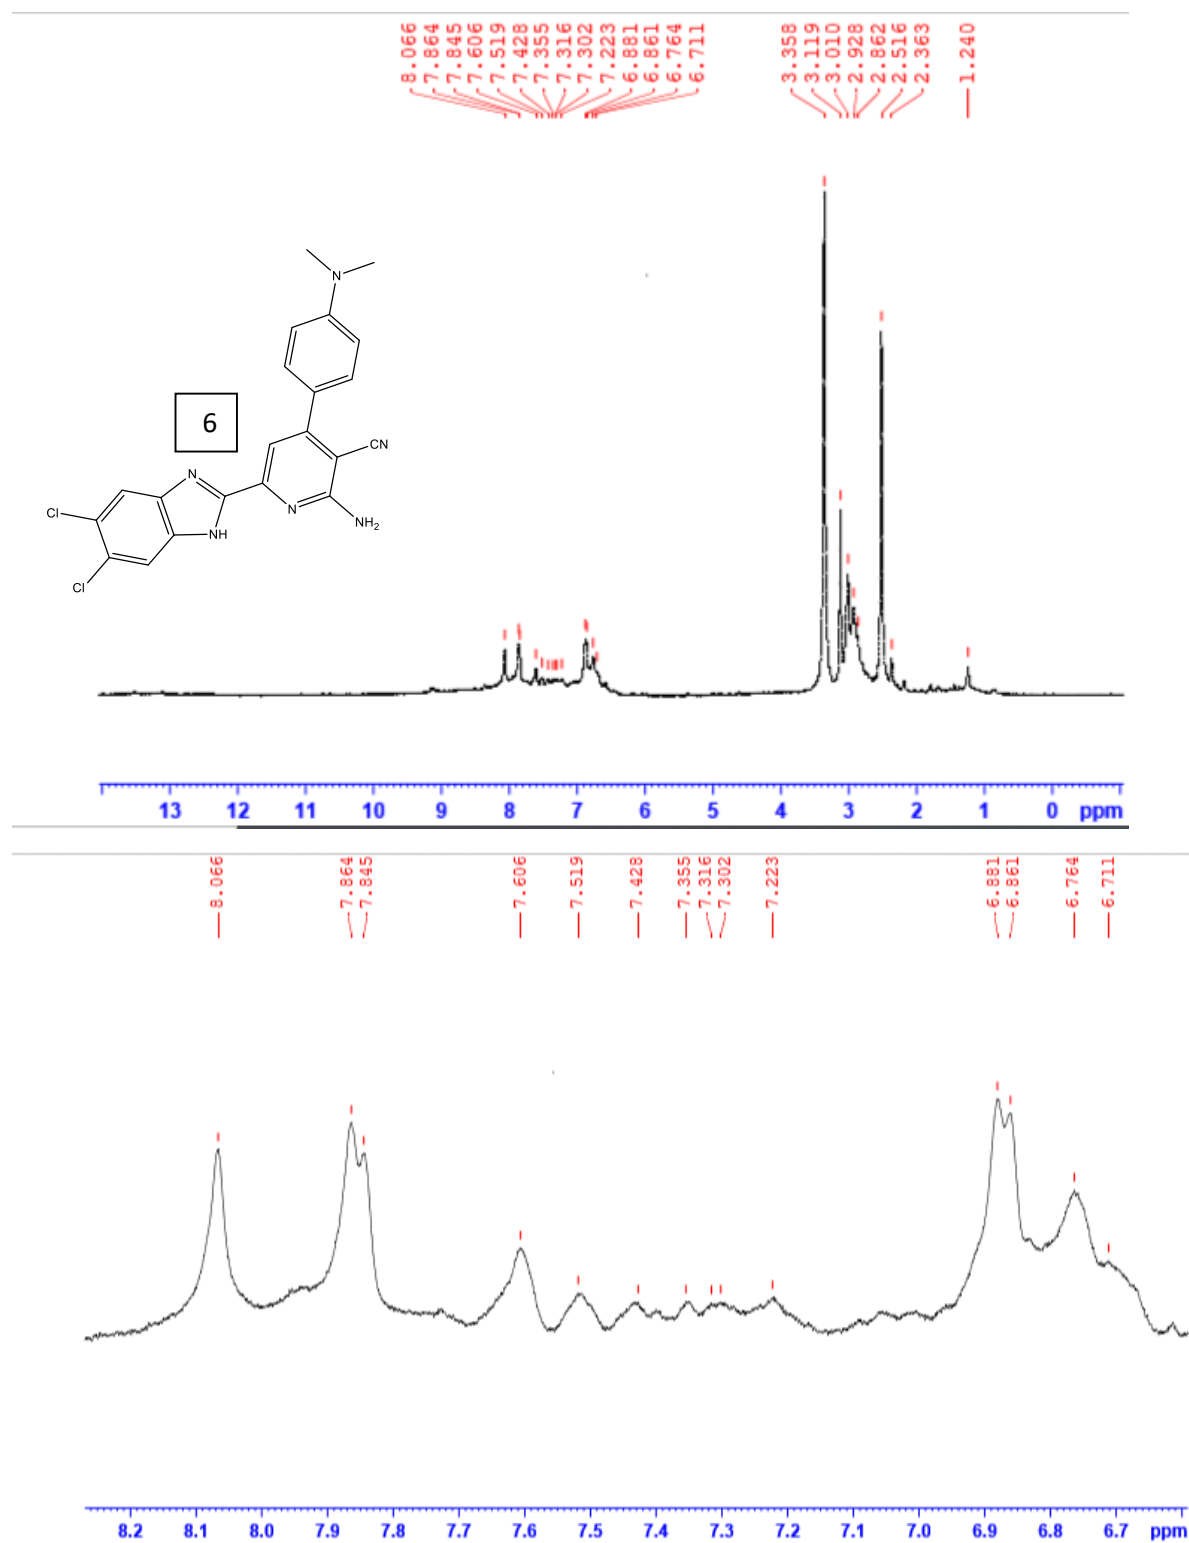

## IR of compound 6

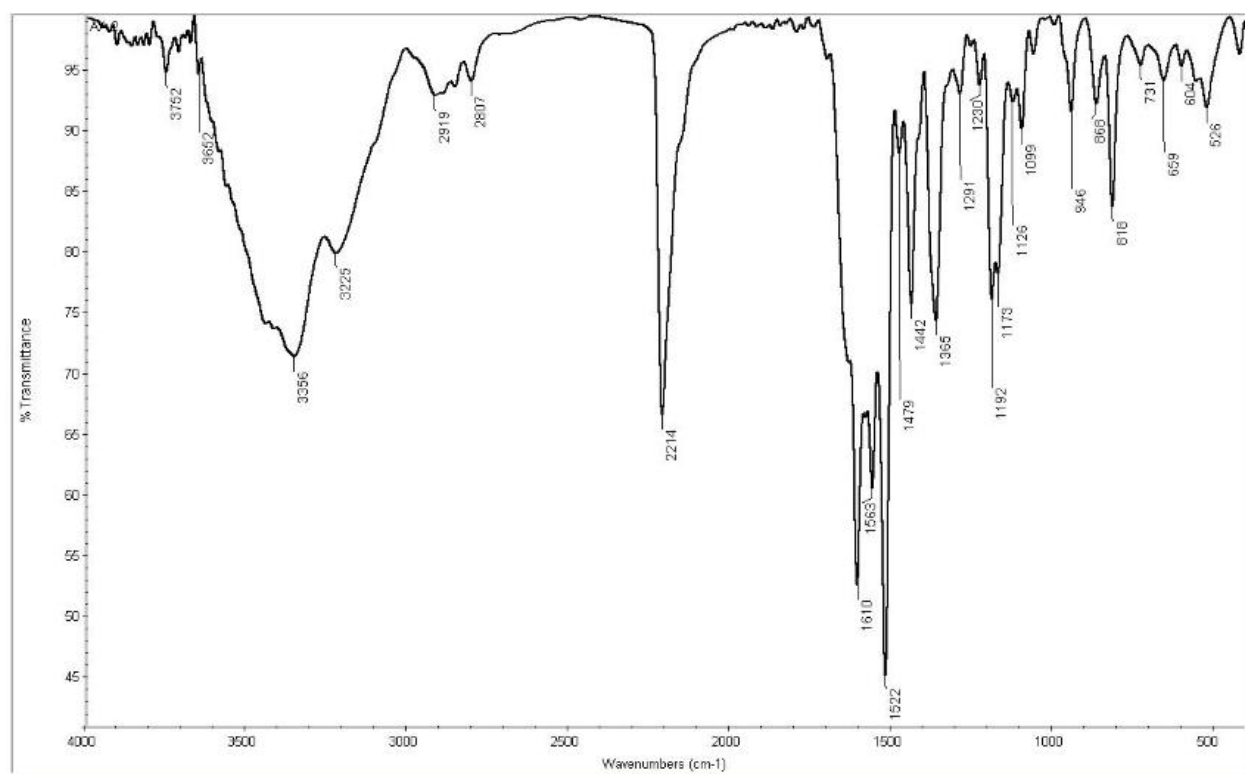

Ac

## Mass of compound 6

RT: 2.02 - 2.33 SM: 15G

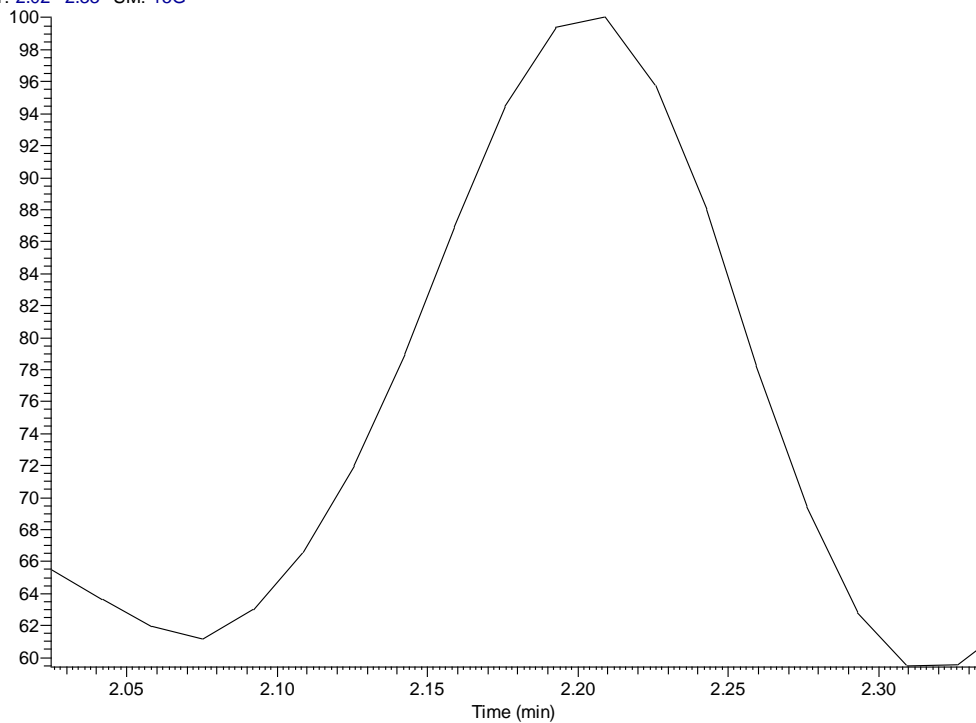

NL:  
1.48E4  
TIC MS  
samira0na  
SHAT-11

samira0naSHAT-11 #72 RT: 1.22 AV: 1 SB: 2 3.20, 3.20 NL: 4.46E2  
T: {0.0} + c EI Full ms [40.00-1000.00]

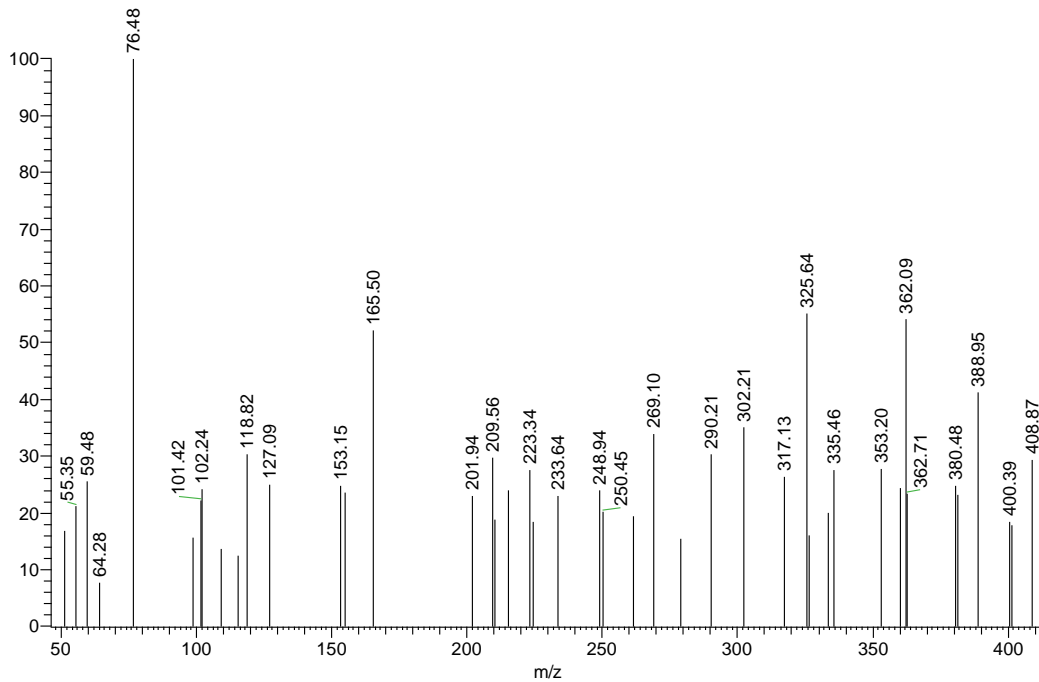

# <sup>1</sup>H NMR of compound 7

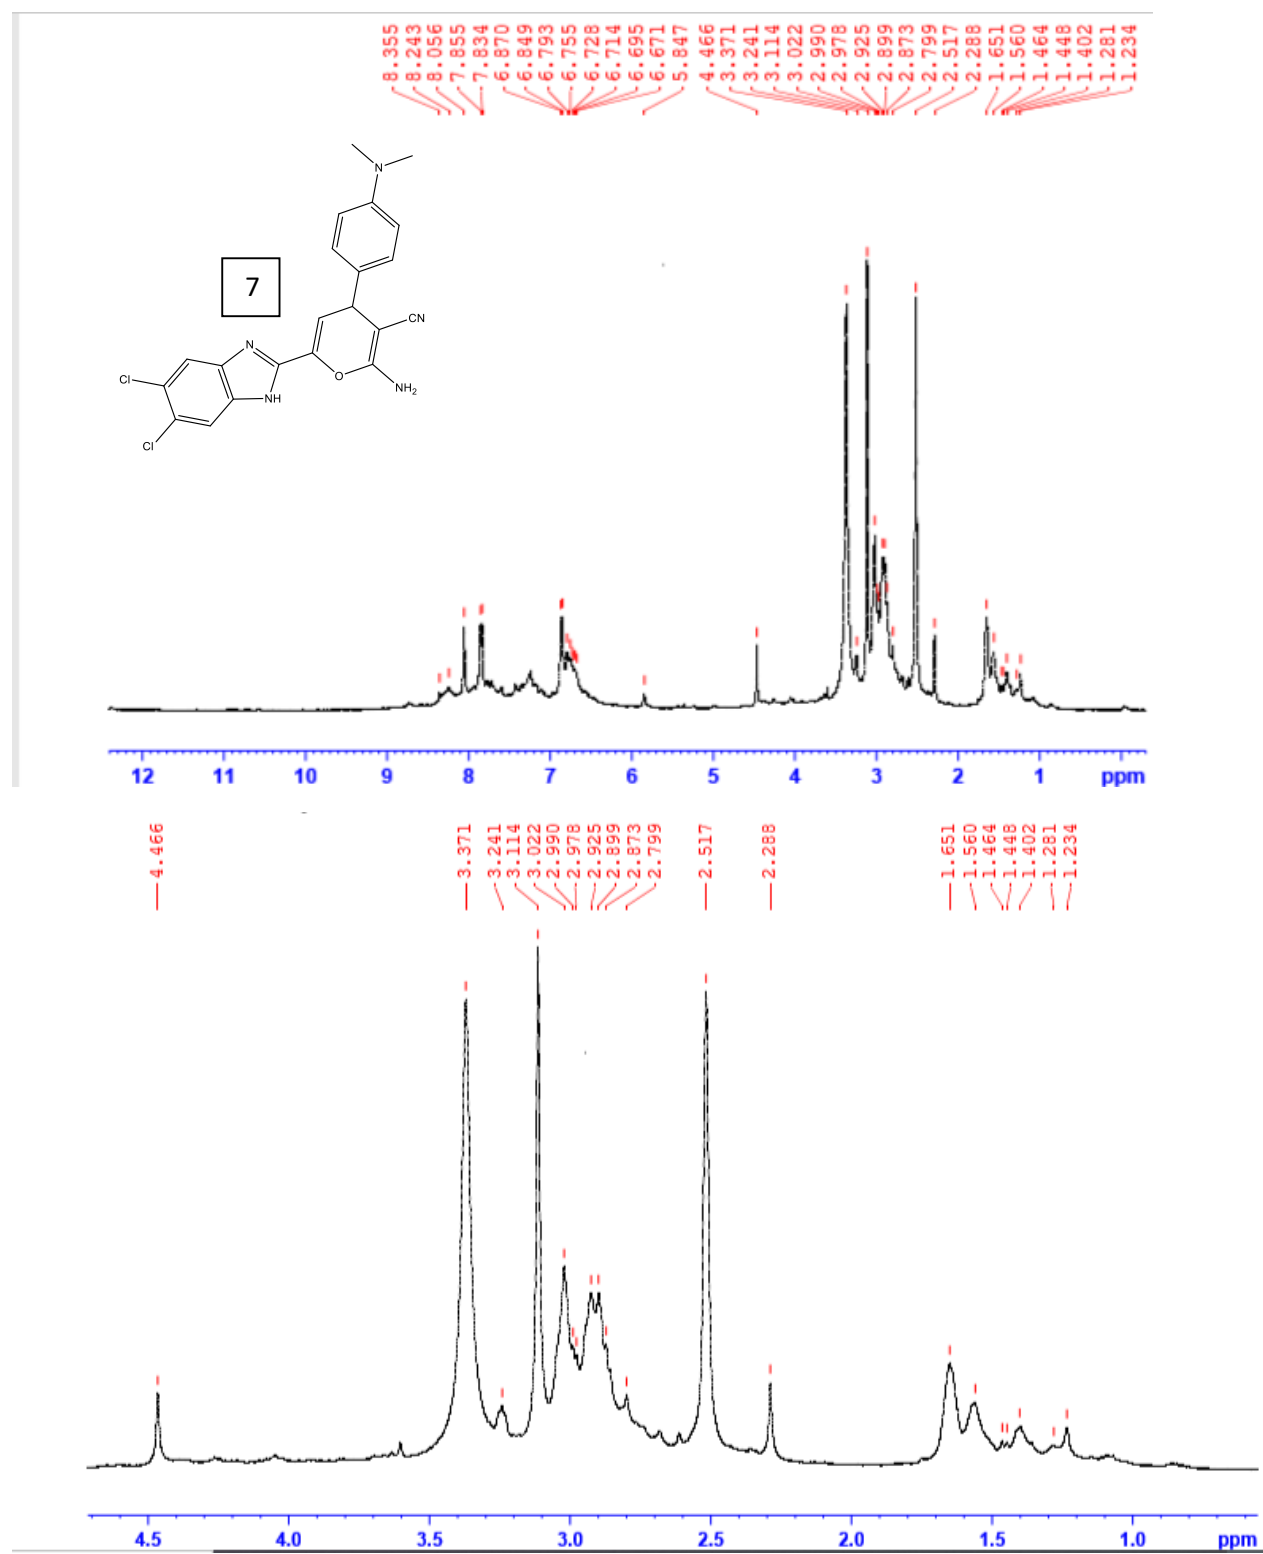

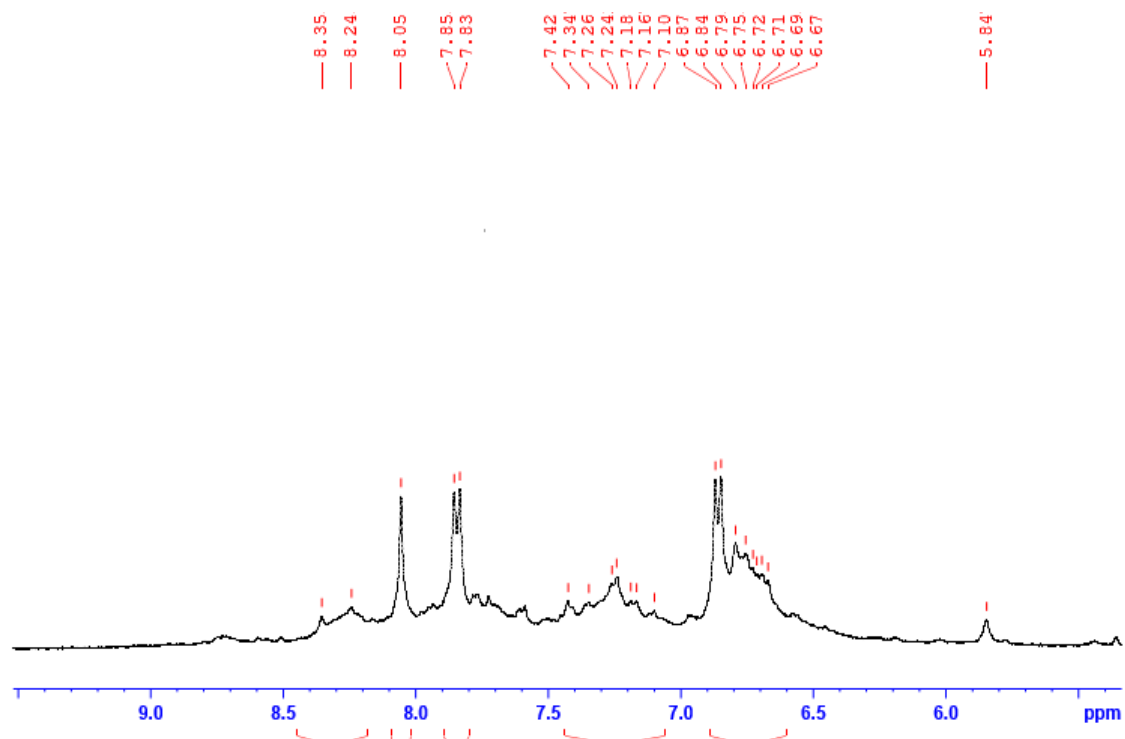

IR of compound 7

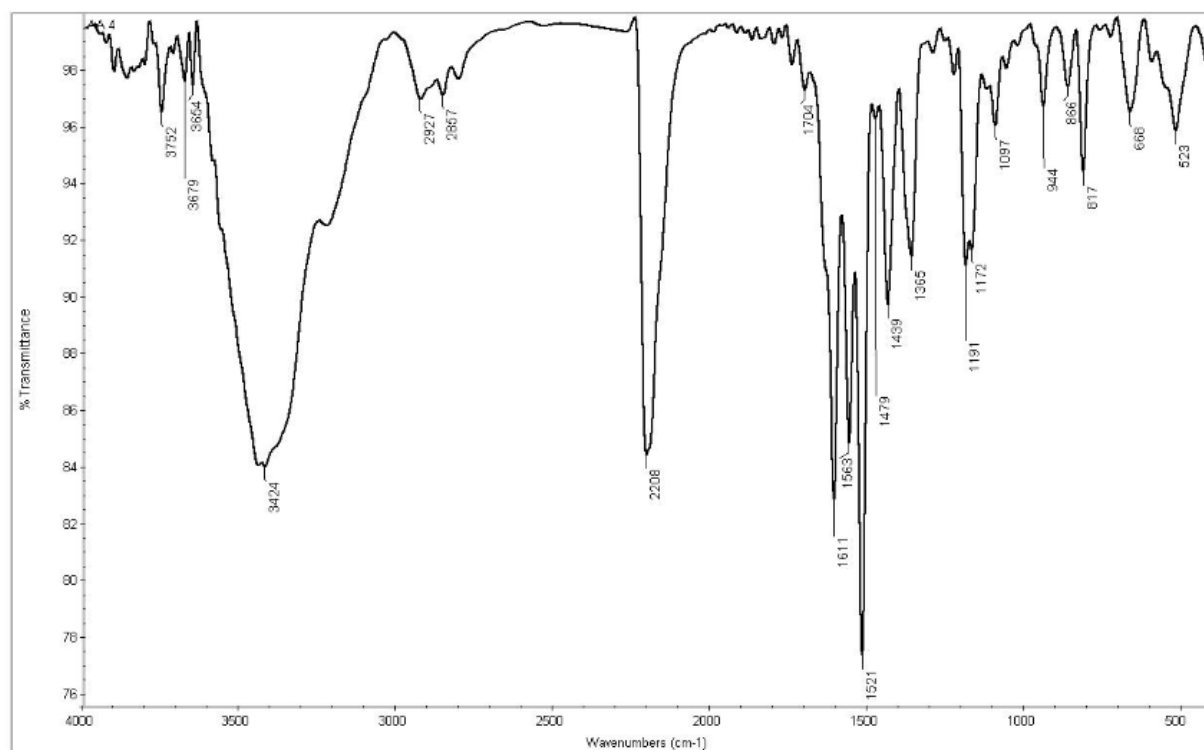



$^{13}\text{C}$  NMR of compound 7

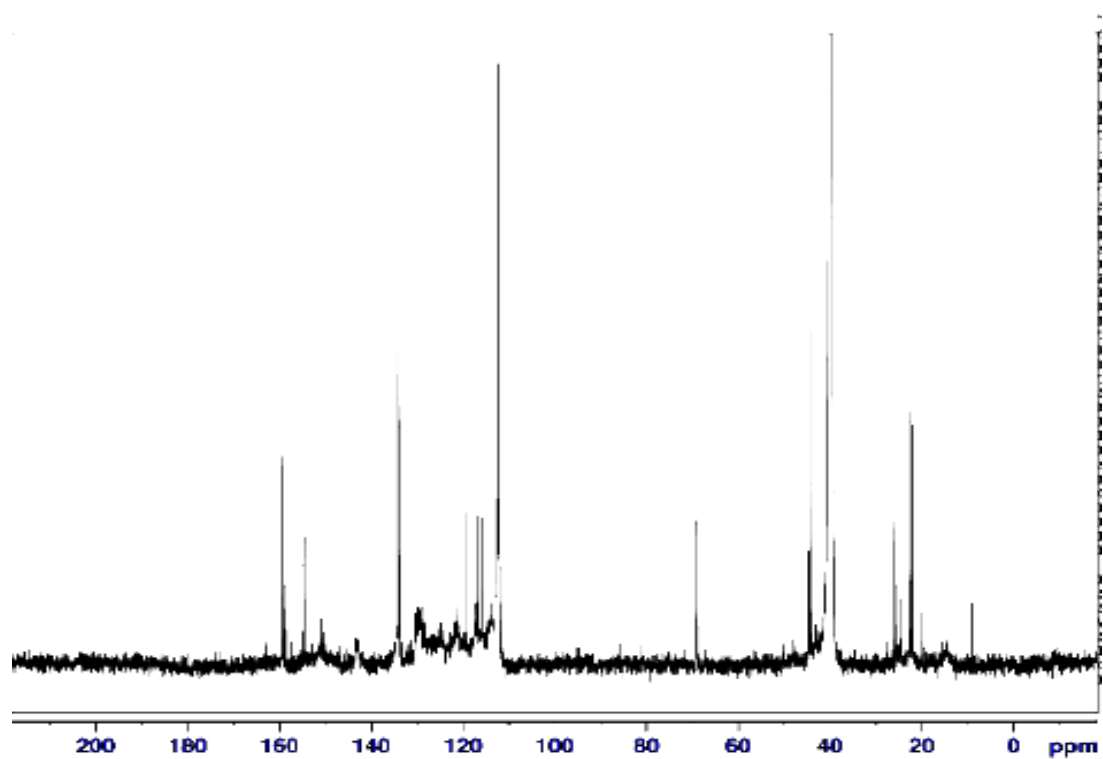

APT of compound 7

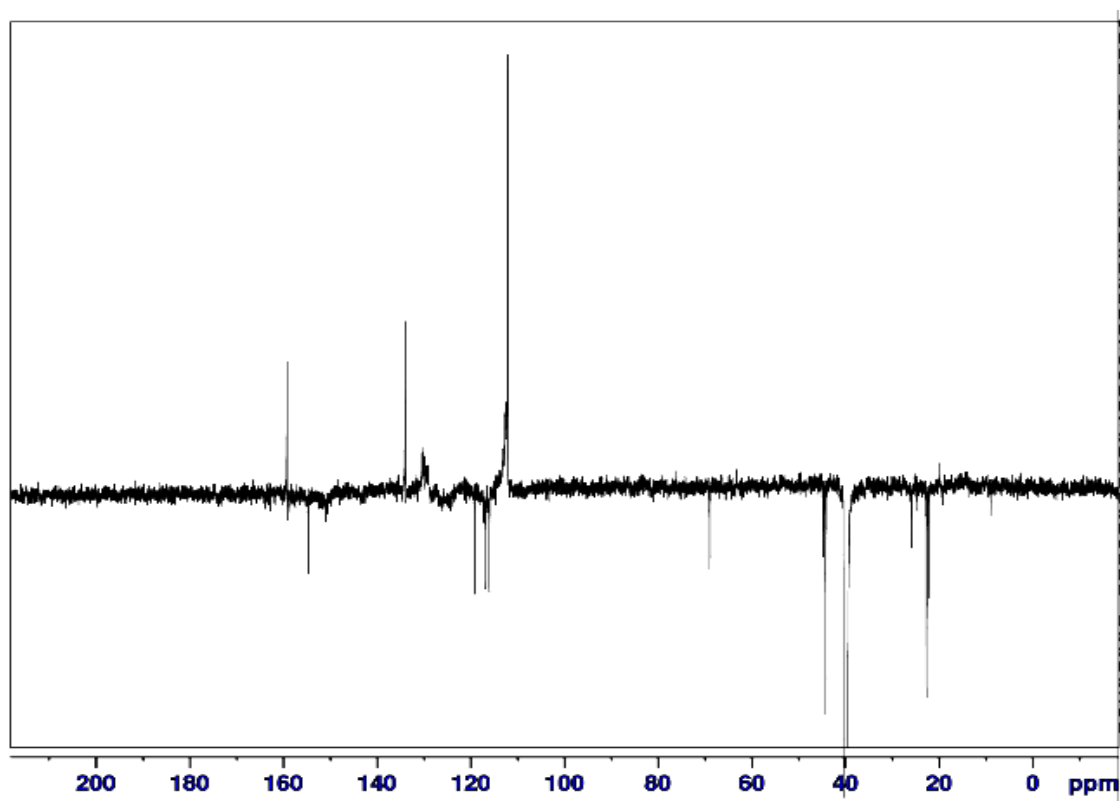

## Mass of compound 7

RT: 2.24 - 2.73 SM: 15G

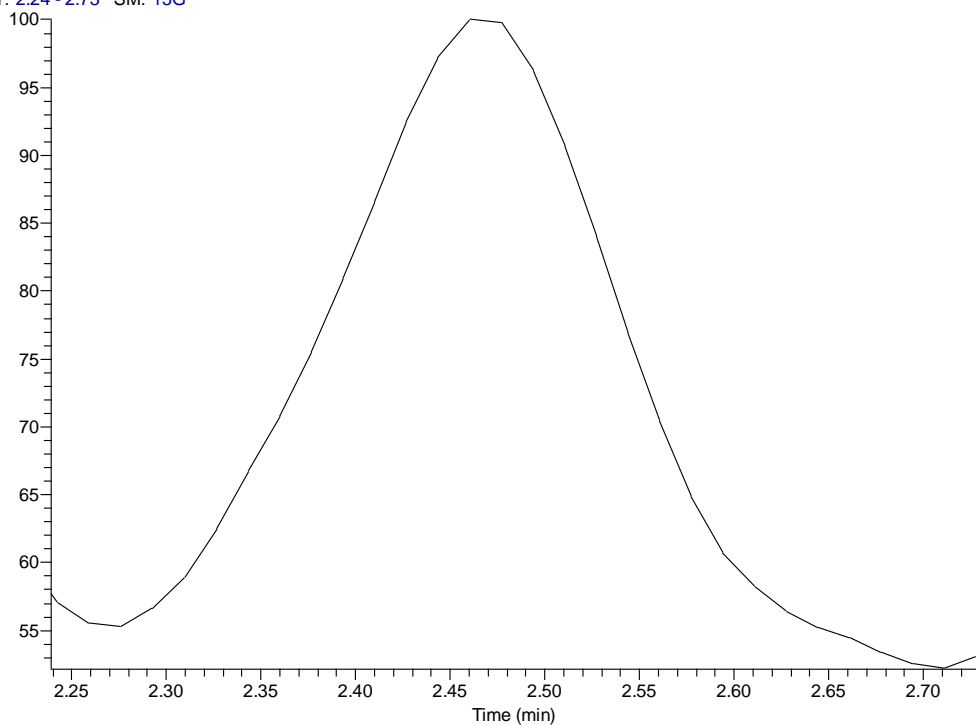

NL:  
2.75E4  
TIC MS  
samira0na  
SHAT-2

samira0naSHAT-2 #148 RT: 2.49 AV: 1 SB: 2 3.25, 3.25 NL: 4.65E2  
T: {0,0} + c EI Full ms [40.00-1000.00]

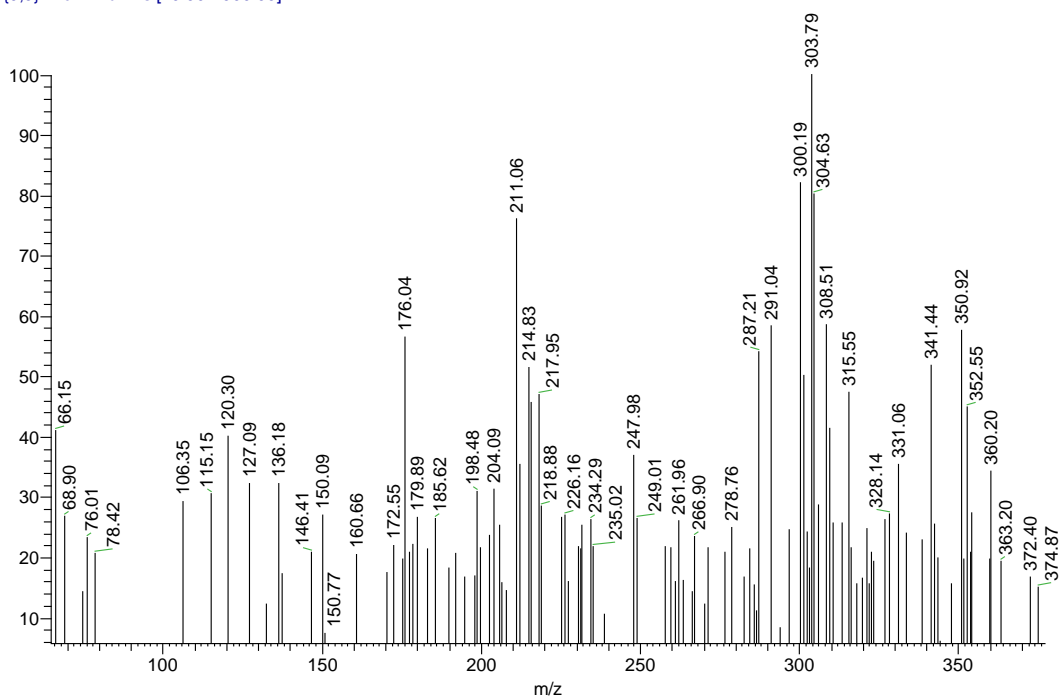

# <sup>1</sup>H NMR of compound 8

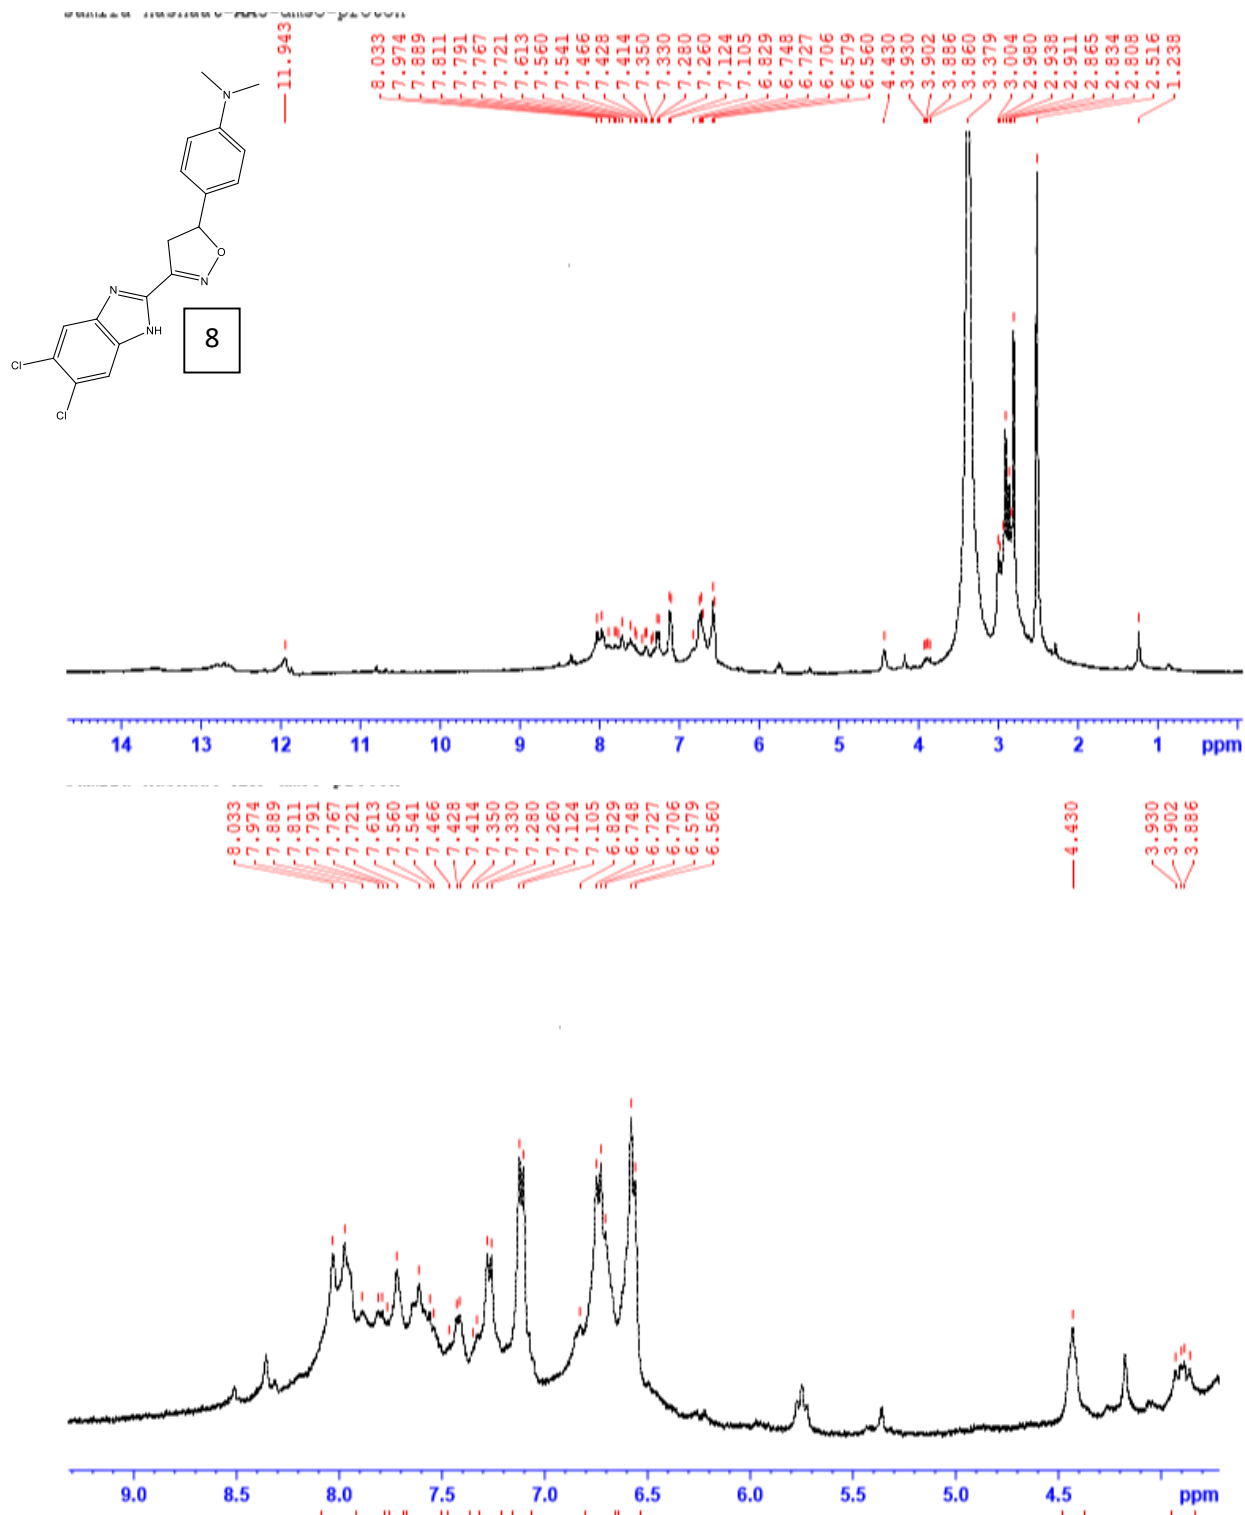

$^{13}\text{C}$  NMR of compound 8

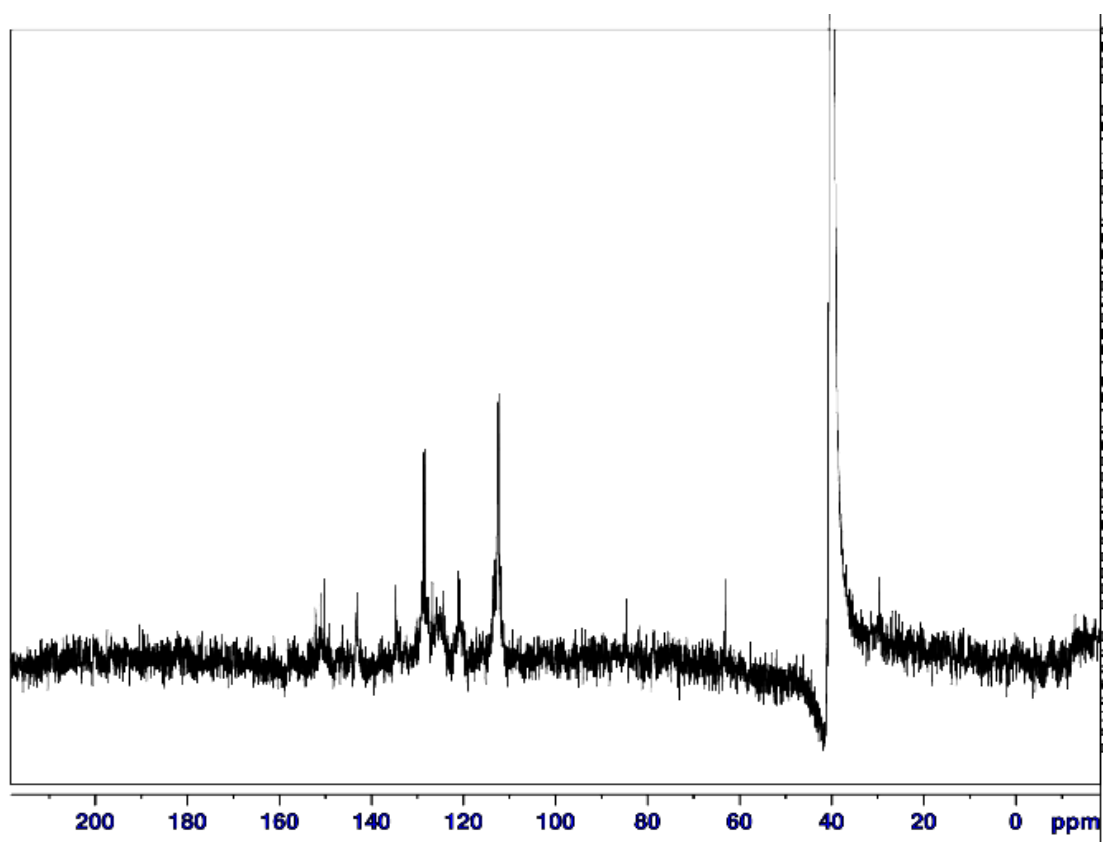

# APT of compound 8

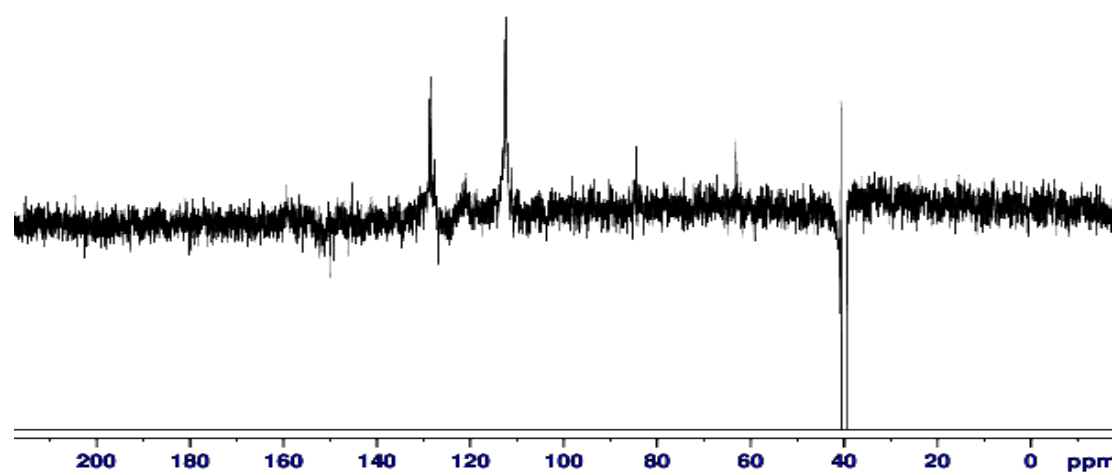

# Cosy of compound 8

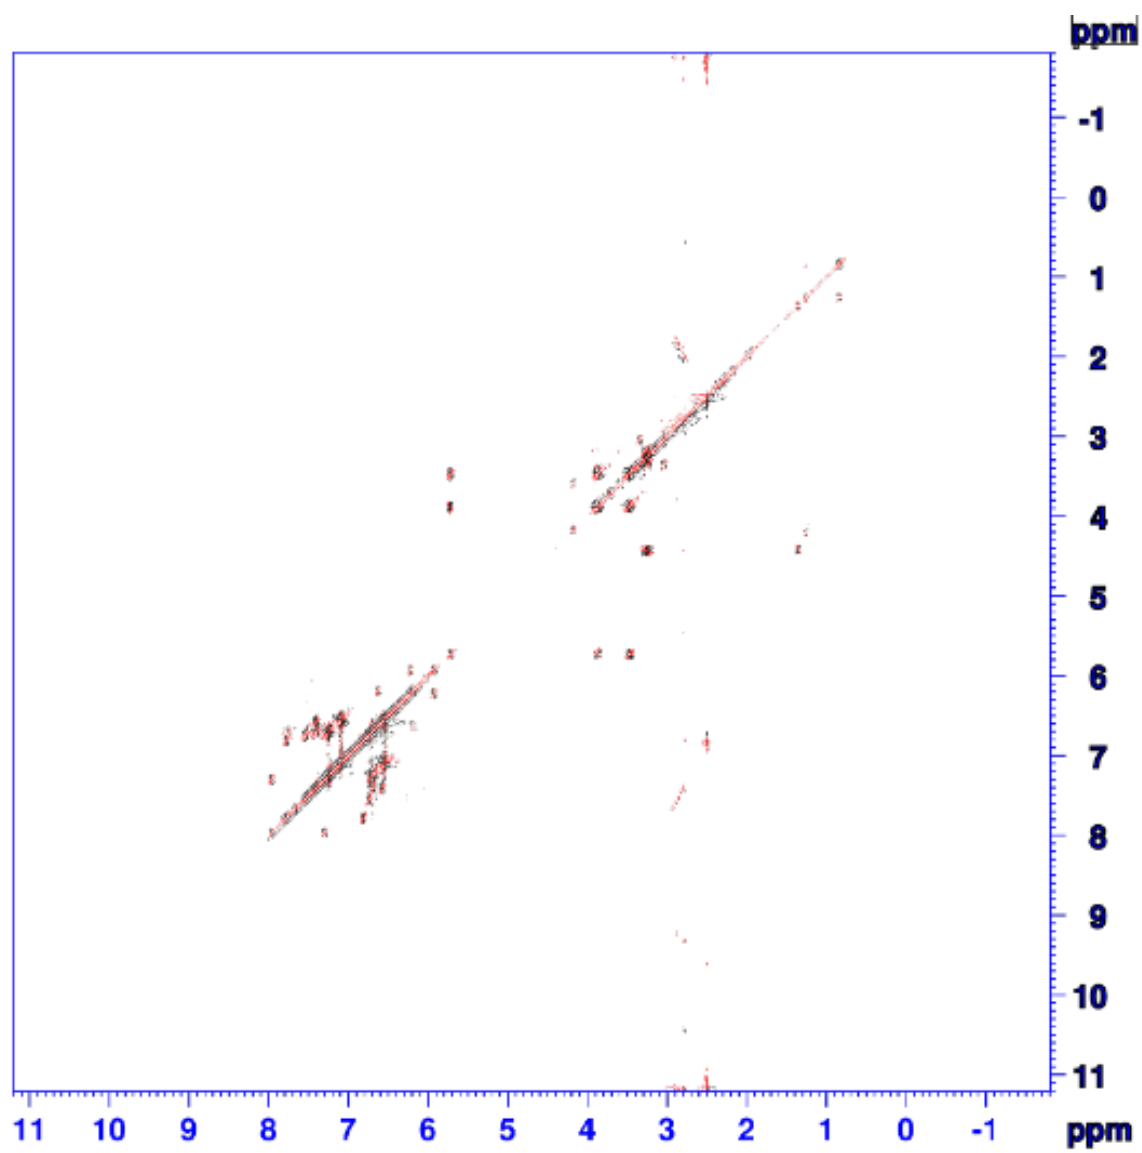

## Mass of compound 8

RT: 3.82 - 4.60 SM: 15G

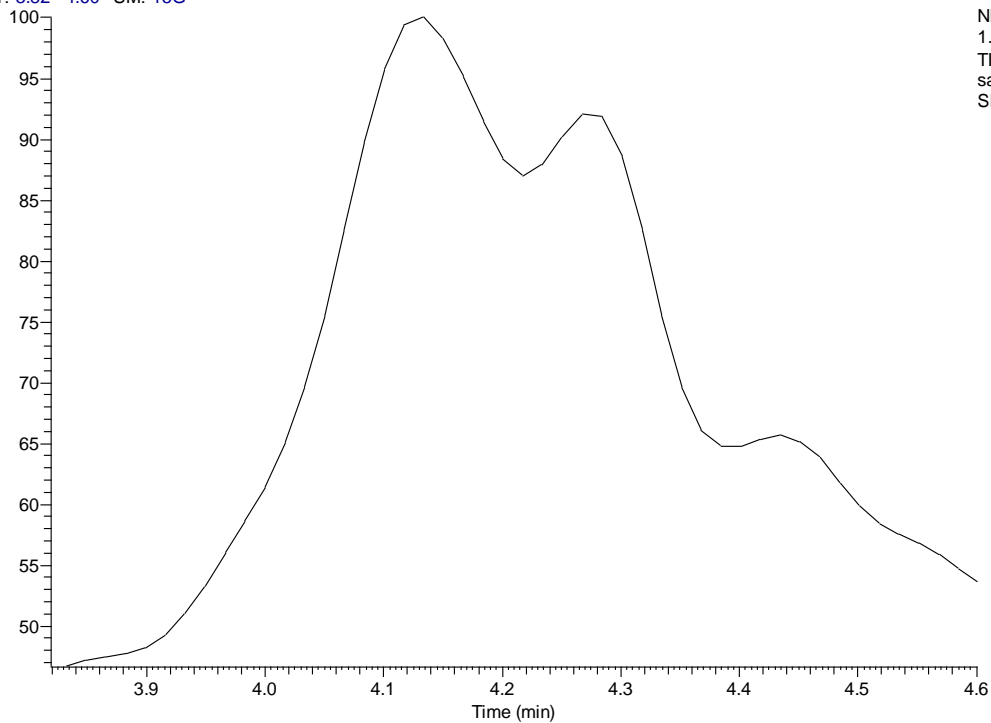

NL:  
1.88E4  
TIC MS  
samira0na  
SHAT-3

Samira0naSHAT-3 #162 RT: 2.73 AV: 1 SB: 2 4.45, 4.45 NL: 2.89E2  
T: {0,0} + c EI Full ms [40.00-1000.00]

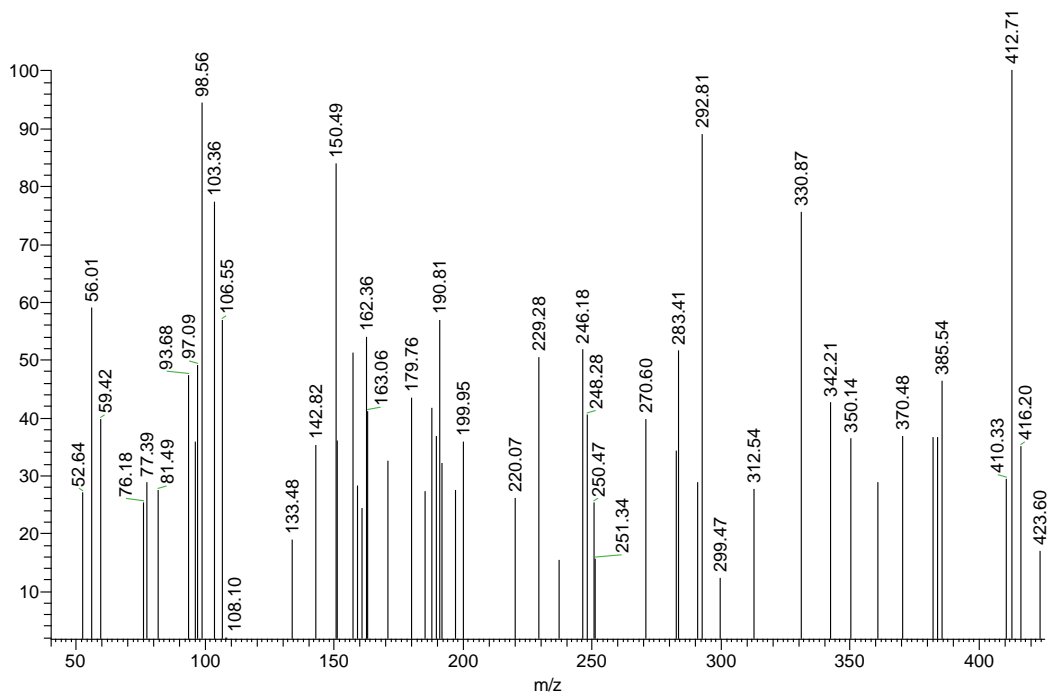

## <sup>1</sup>H NMR of compound 9

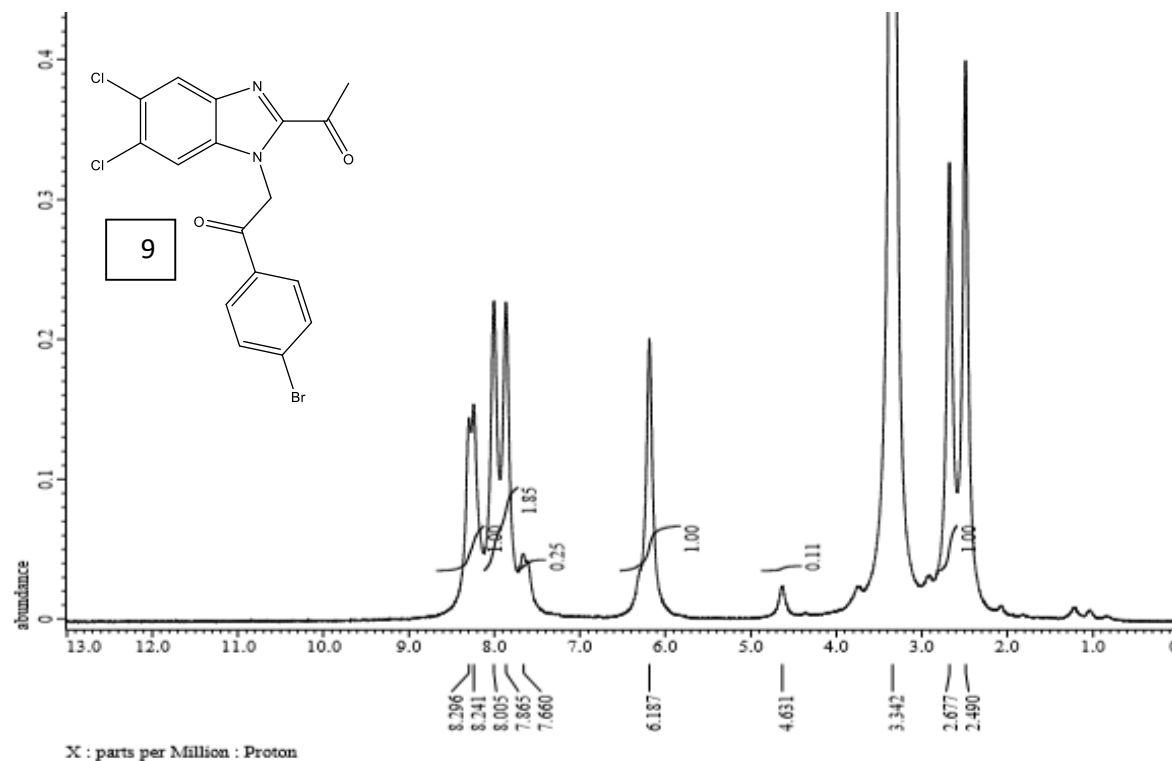



## IR of compound 9

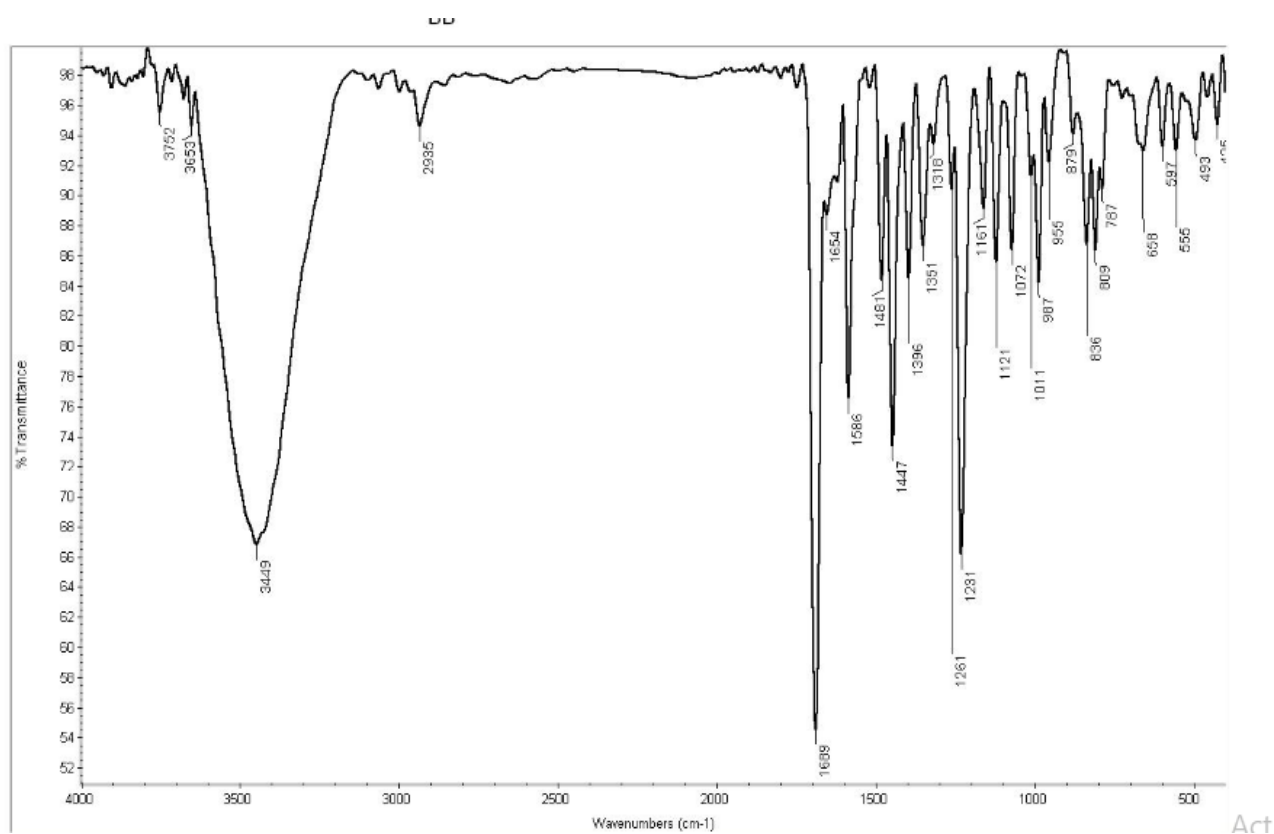

## Mass of compound 9

RT: 1.76-3.51 SM: 15G

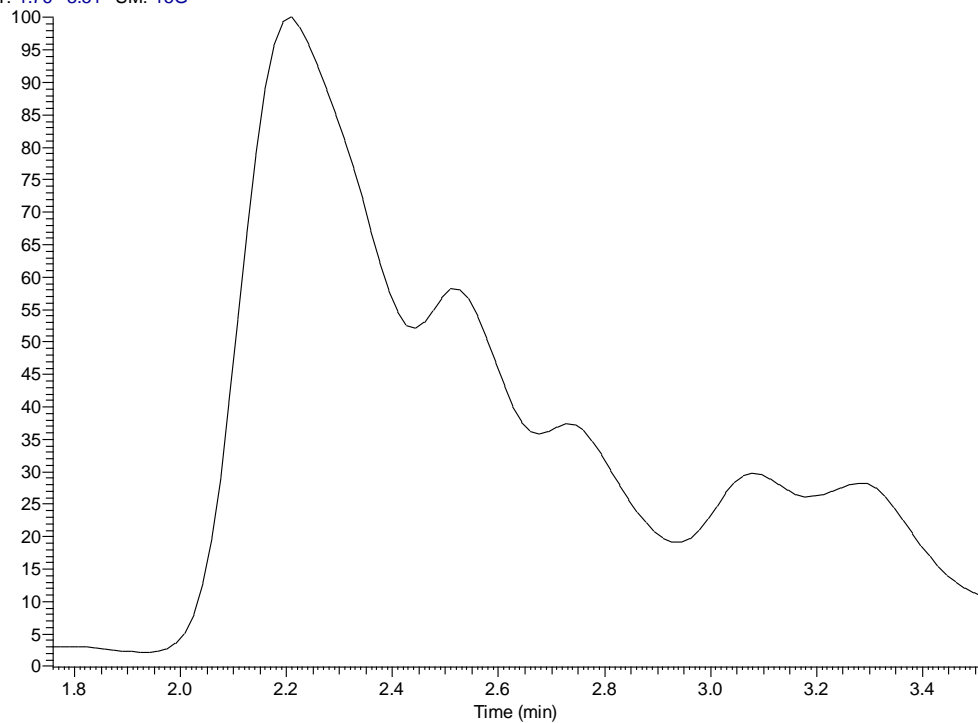

NL:  
4.41E5  
TIC MS  
samira0na  
SHAT-4

samira0naSHAT-4 #261-262 RT: 4.38-4.40 AV: 2 SB: 2 4.45, 4.45 NL: 1.75E2  
T: {0,0} + c EI Full ms [40.00-1000.00]

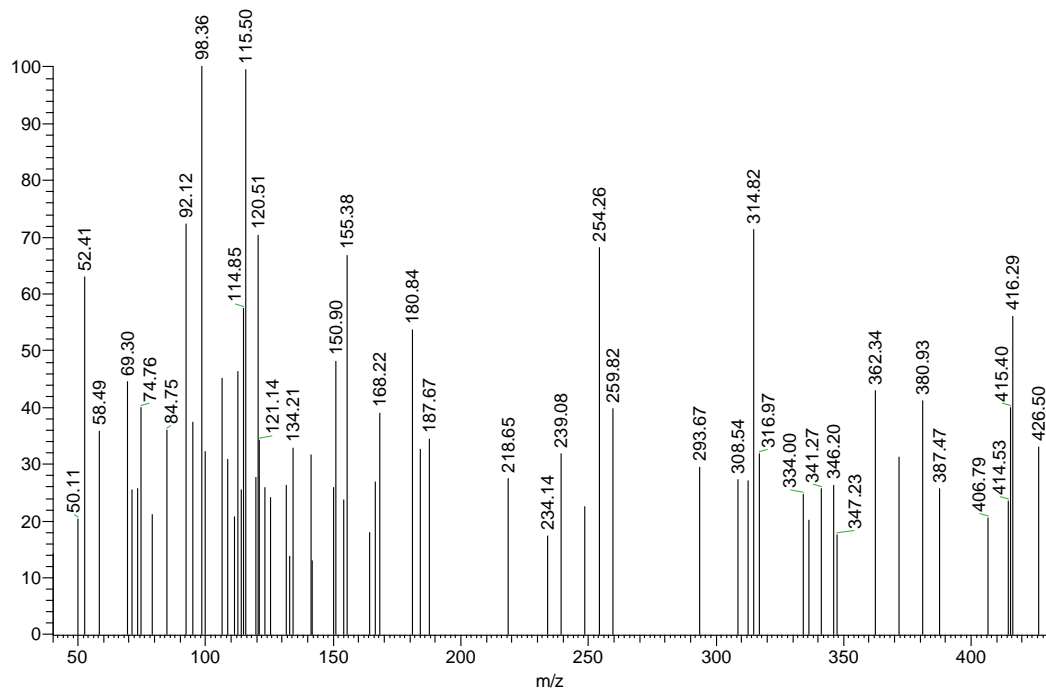

# <sup>1</sup>H NMR of compound 10

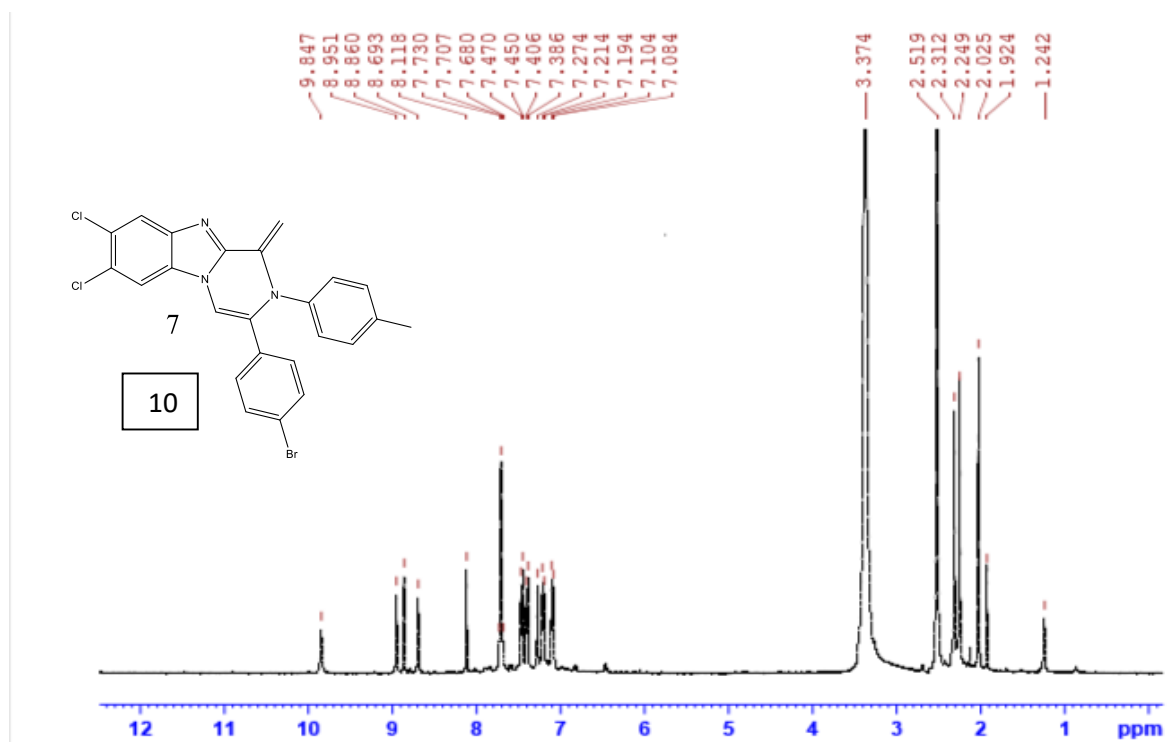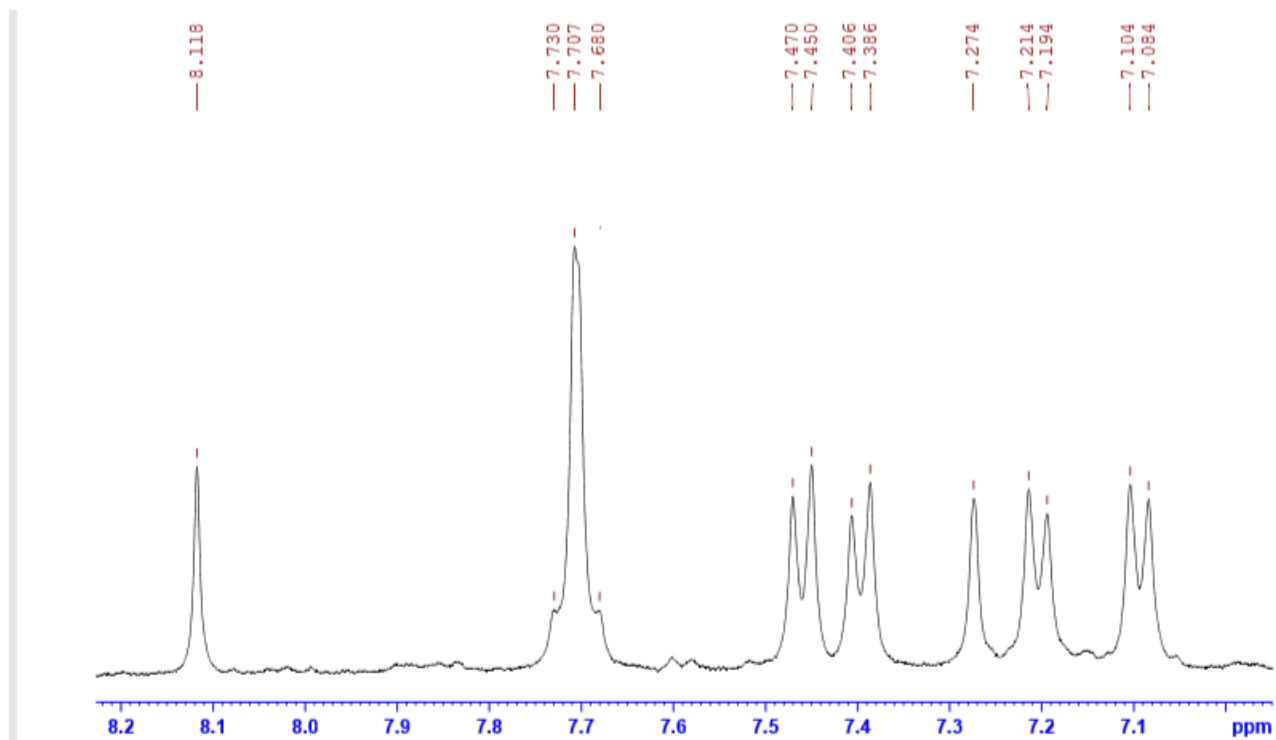

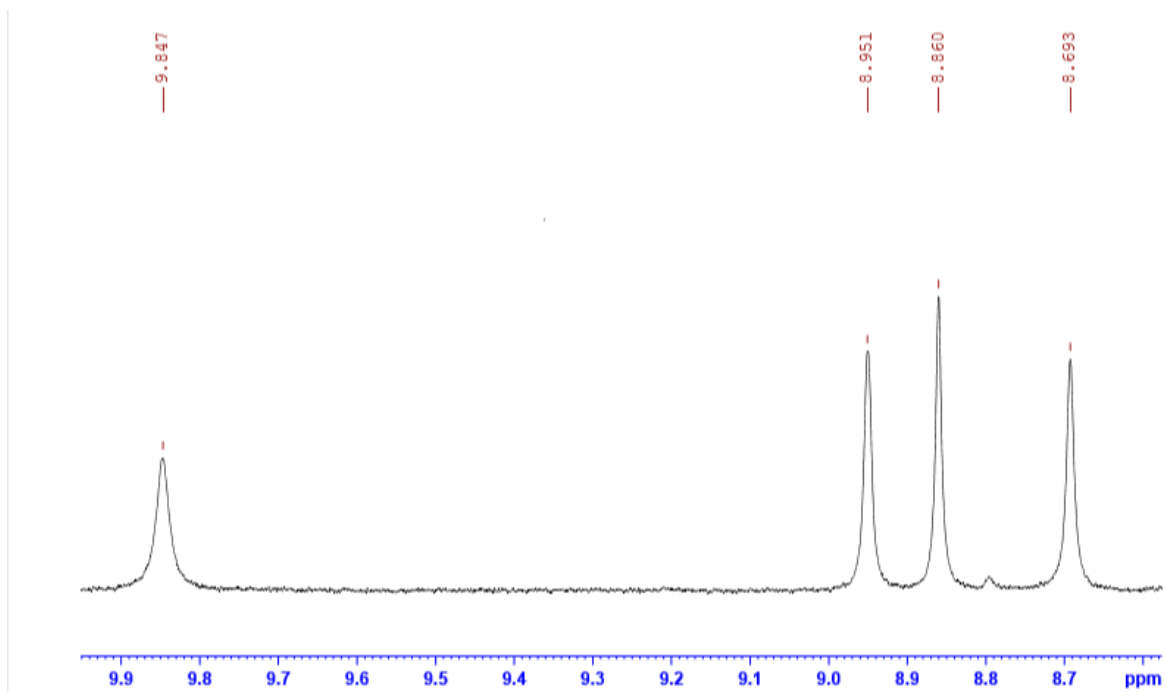

<sup>13</sup>C NMR of compound 10

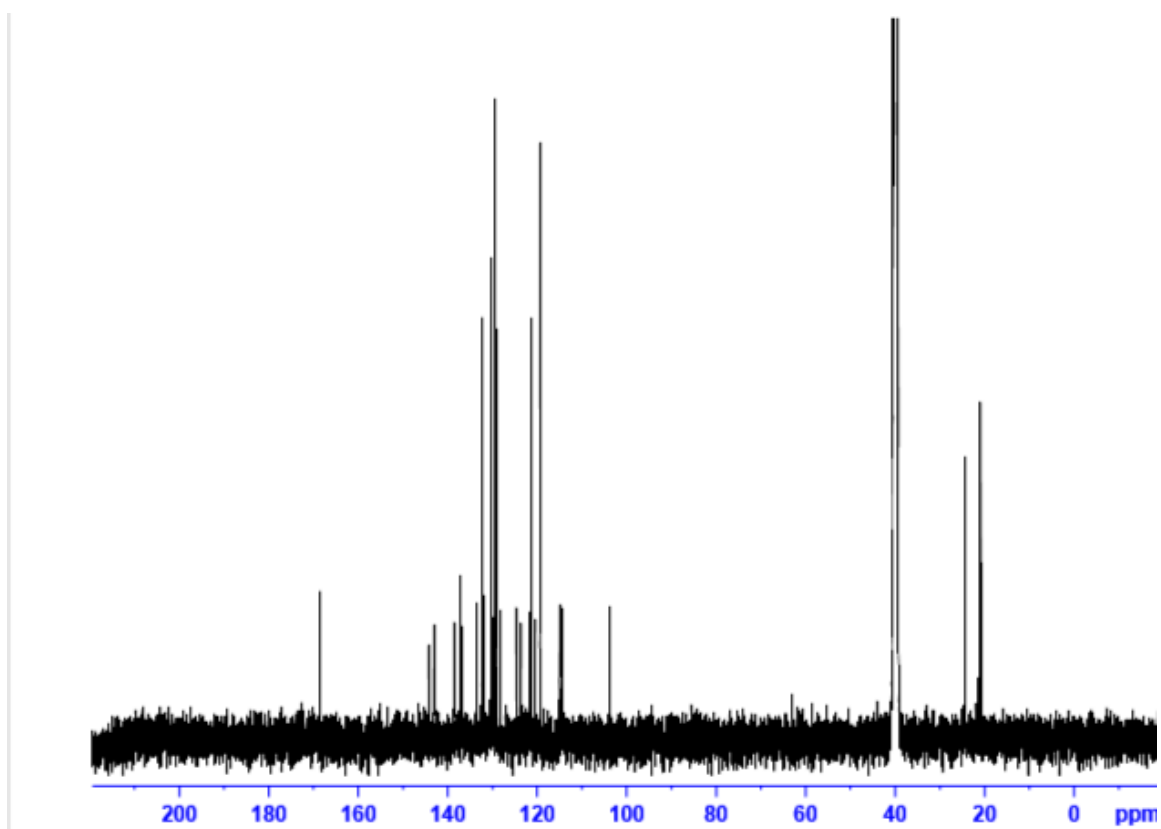

## Mass of compound 10

RT: 1.57 - 2.07 SM: 15G

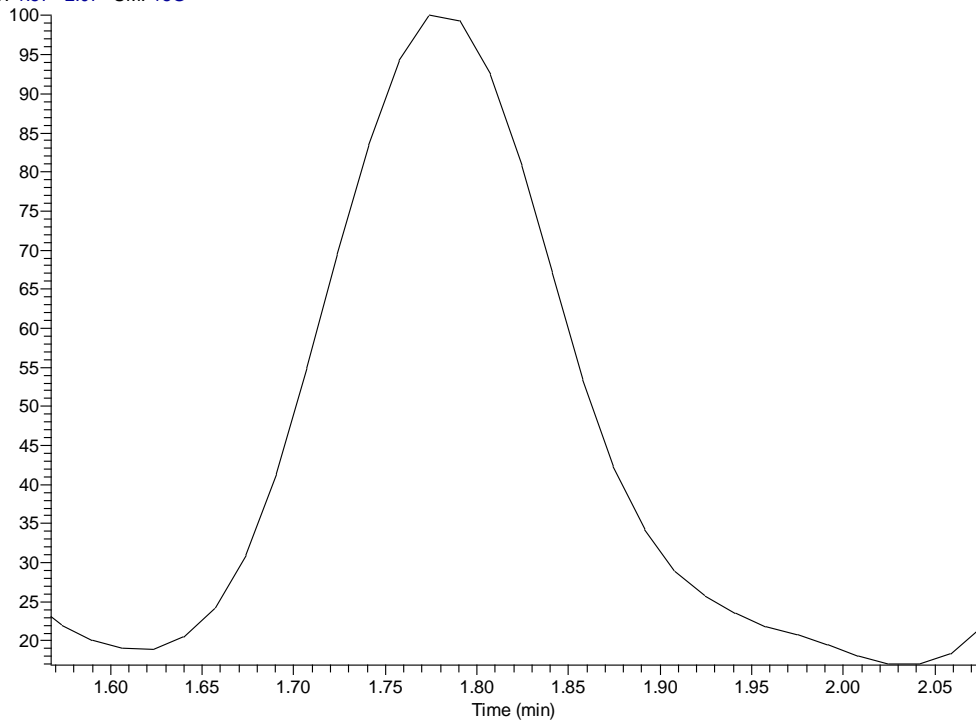

NL:  
2.00E4  
TIC MS  
samira0na  
SHAT-5

samira0naSHAT-5 #267 RT: 4.49 AV: 1 SB: 2 3.06 , 3.01 NL: 2.99E2  
T: {0,0} + c EI Full ms [40.00-1000.00]

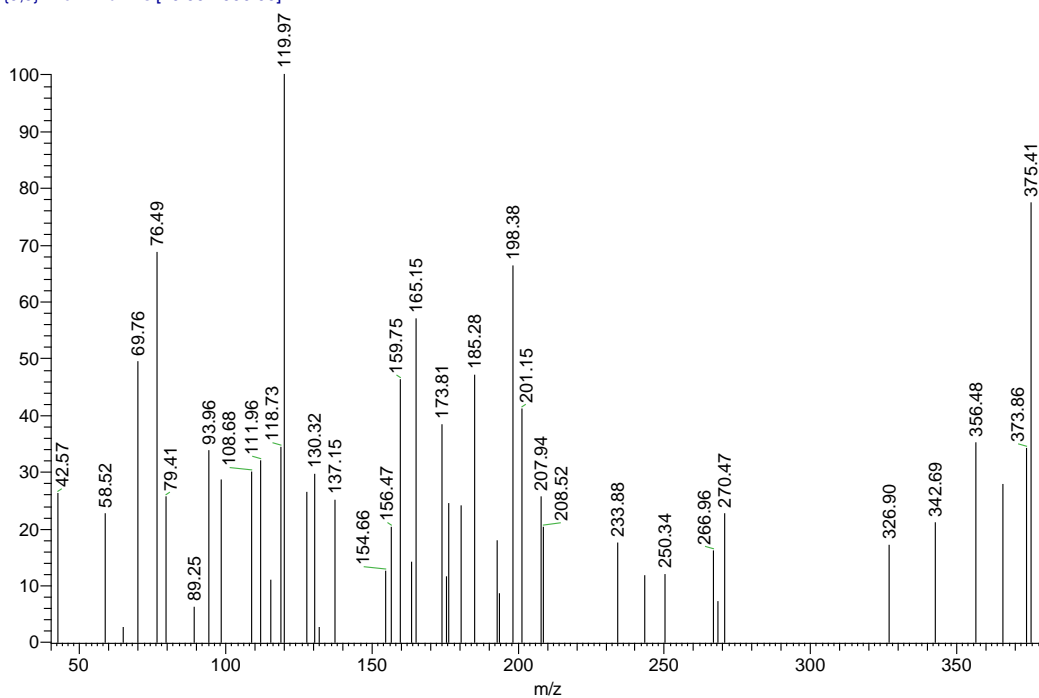

## $^1\text{H}$ NMR of compound 11

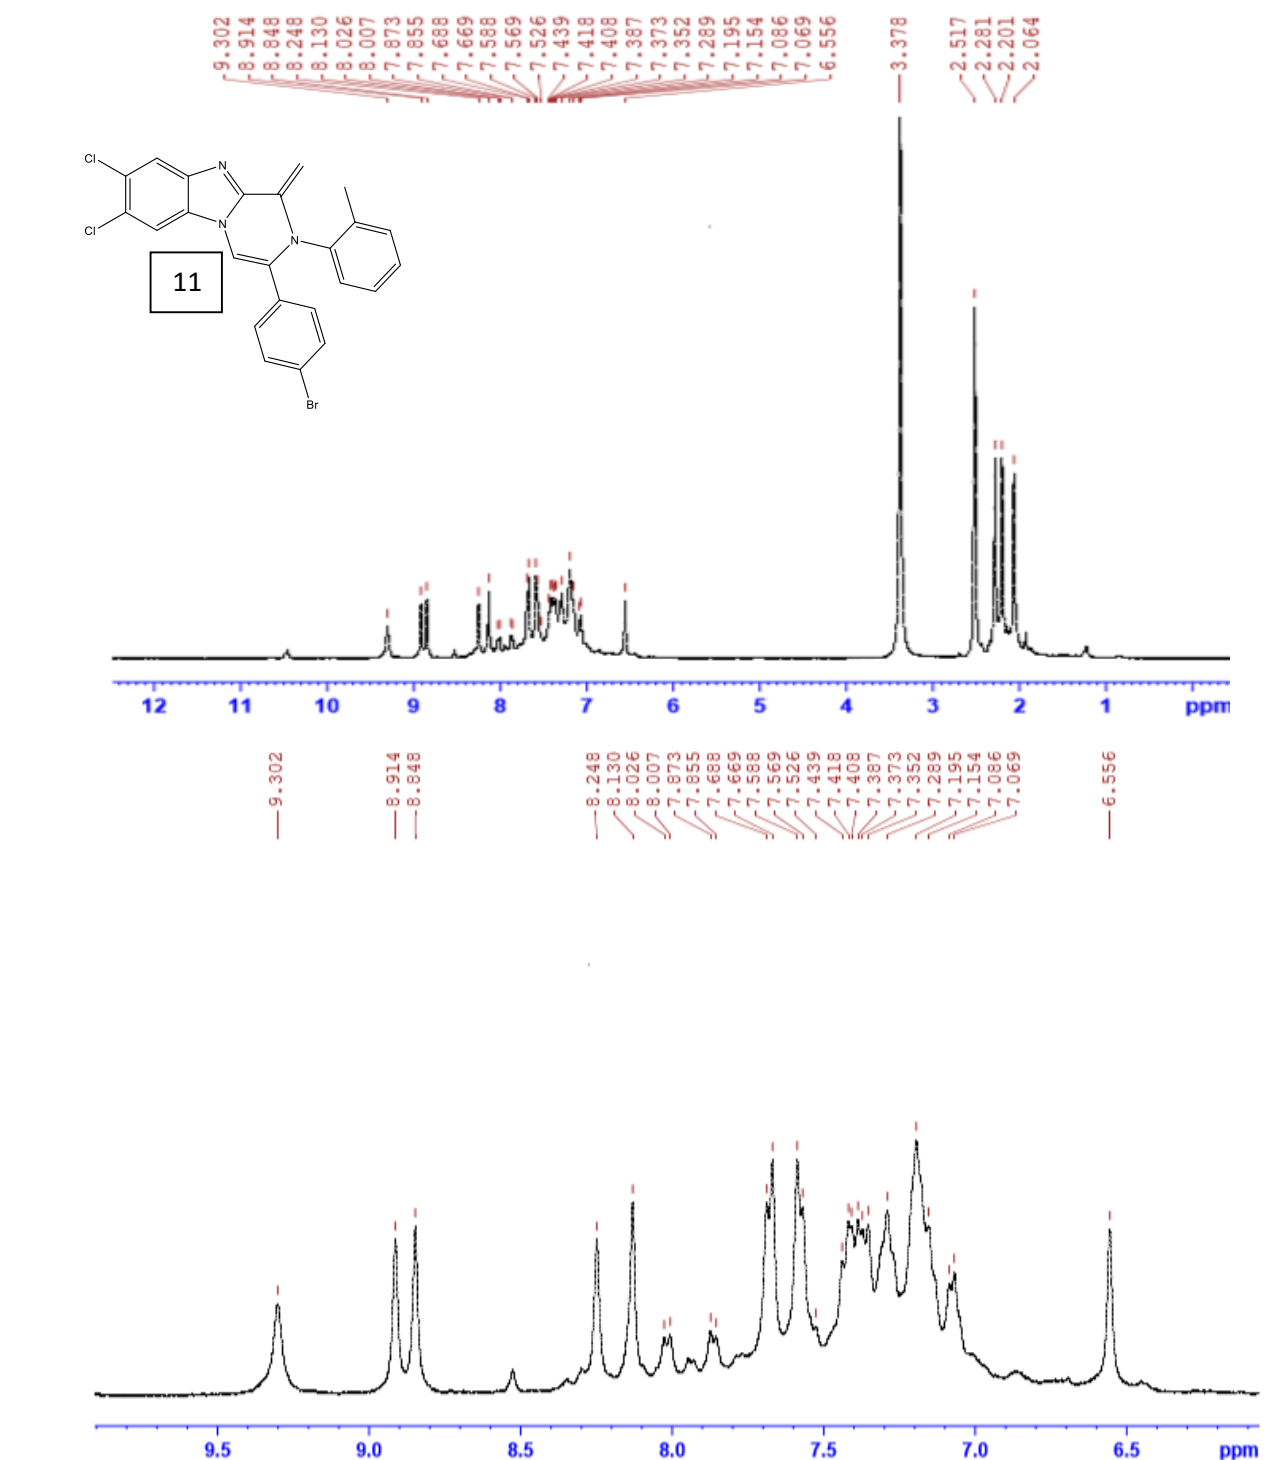

## Mass of compound 11

RT: 3.39 - 3.84 SM: 15G

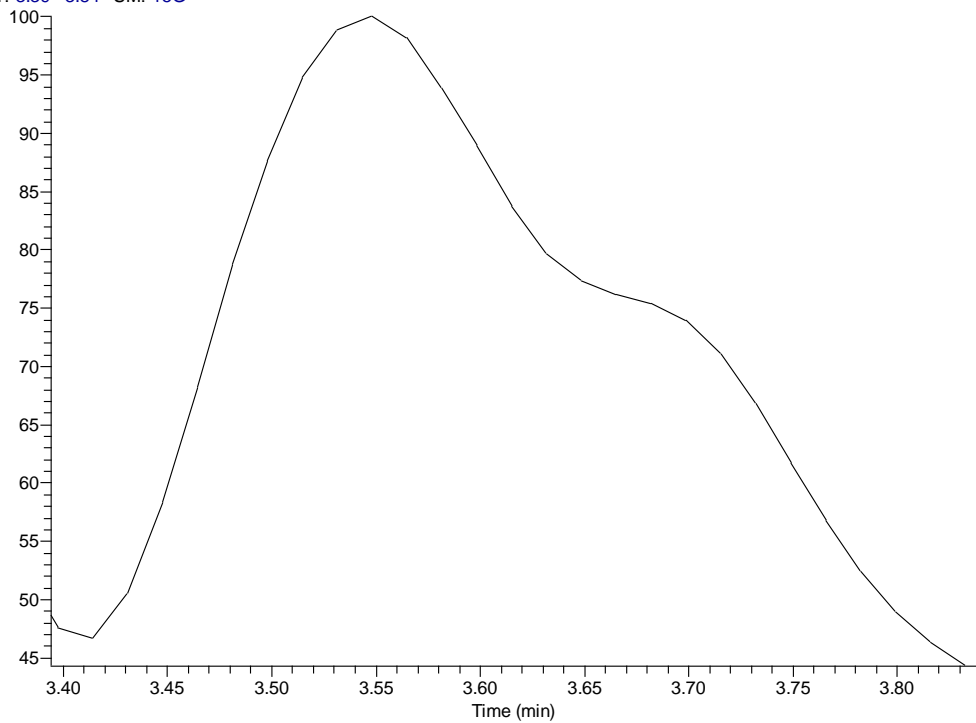

NL:  
3.05E4  
TIC MS  
samira0na  
SHAT-6

samira0naSHAT-6 #221 RT: 3.72 AV: 1 SB: 2 3.83, 3.83 NL: 5.60E2  
T: {0,0} + c EI Full ms [40.00-1000.00]

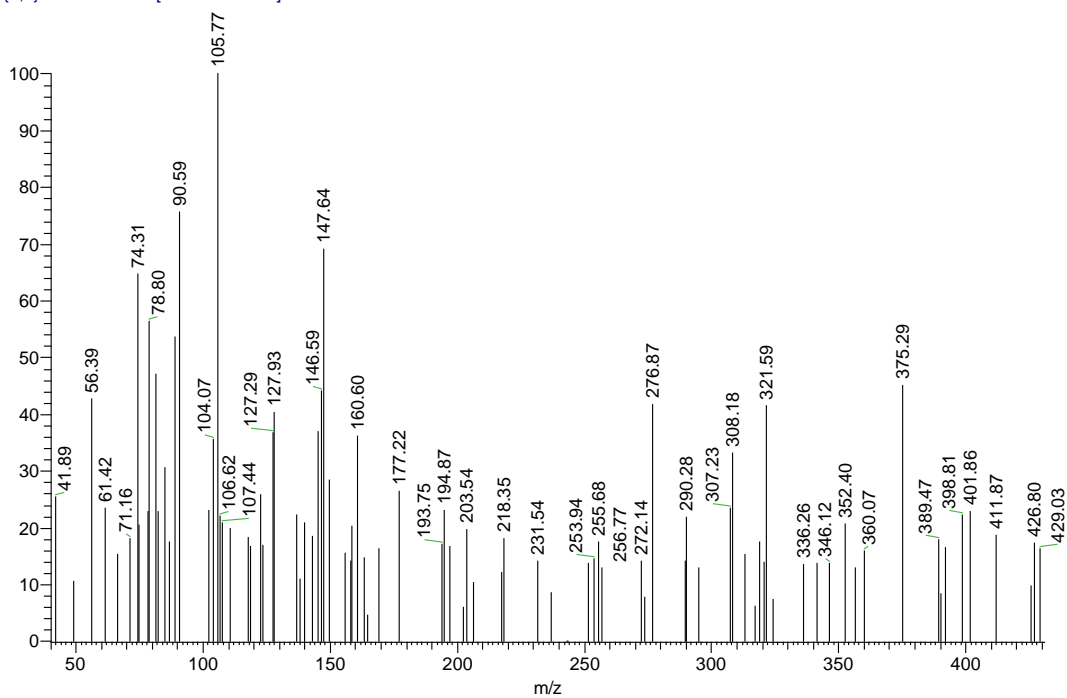

<sup>1</sup>H NMR of compound 12

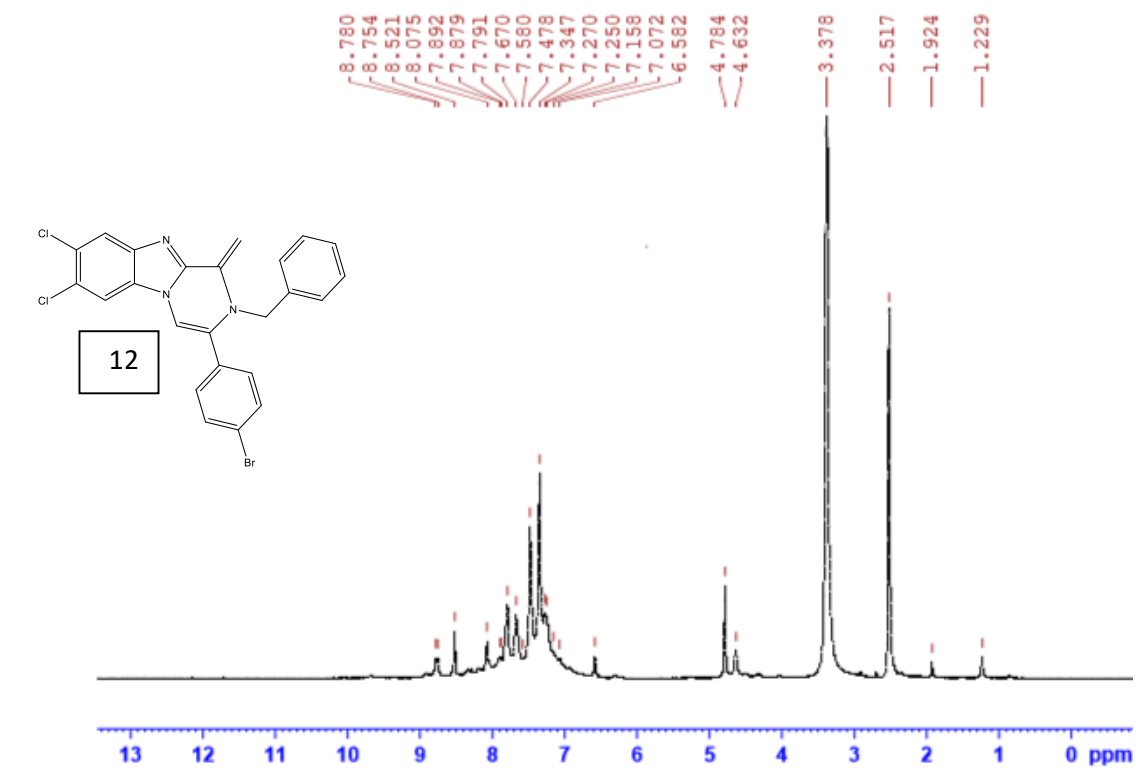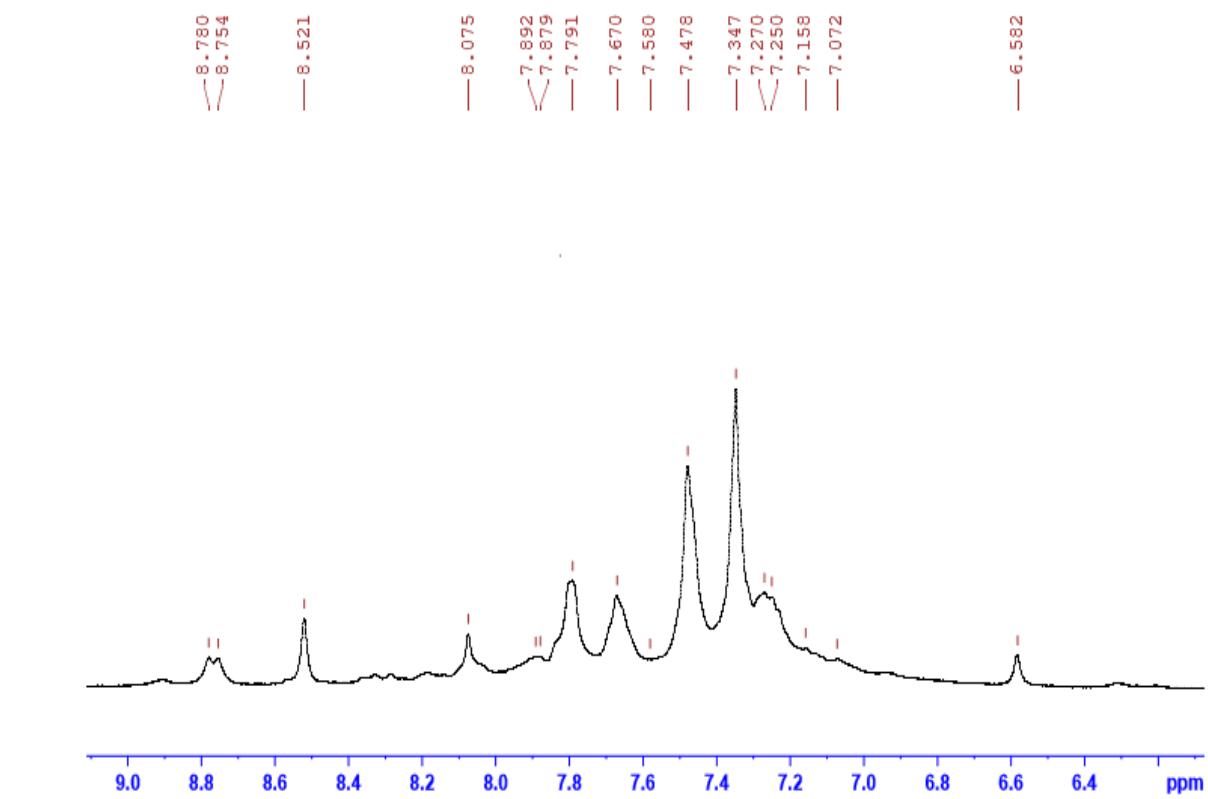



$^{13}\text{C}$  NMR of compound 12

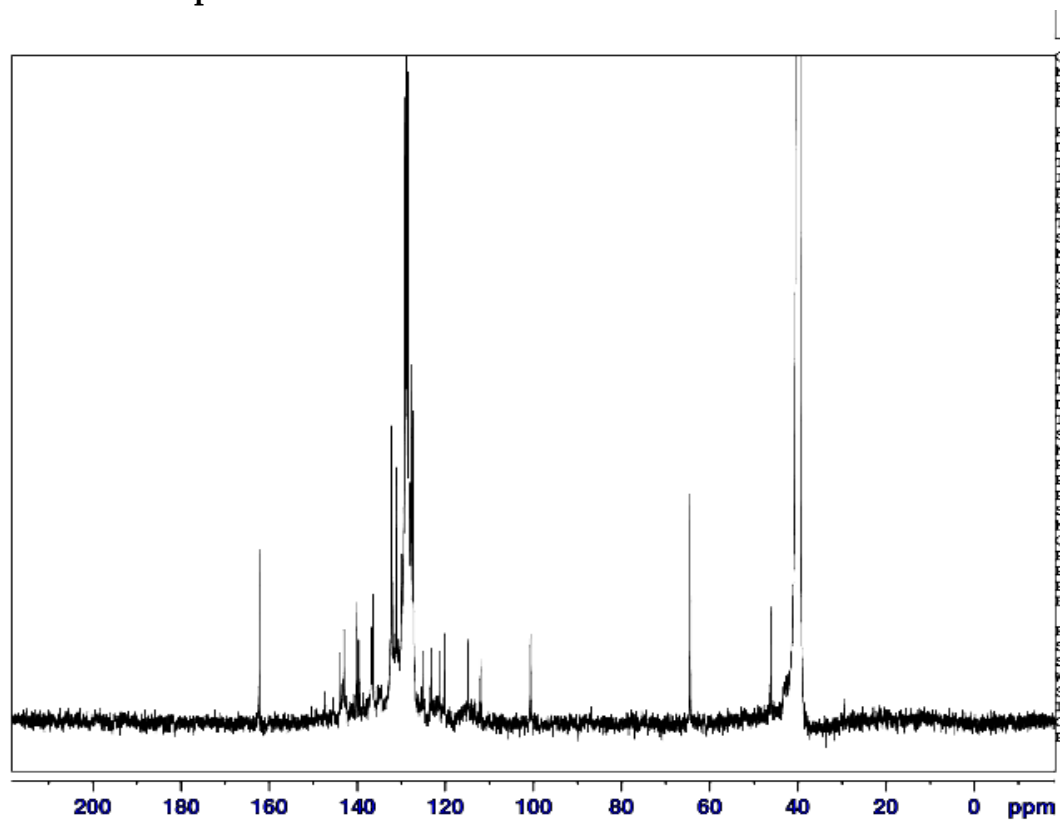

APT of compound 12

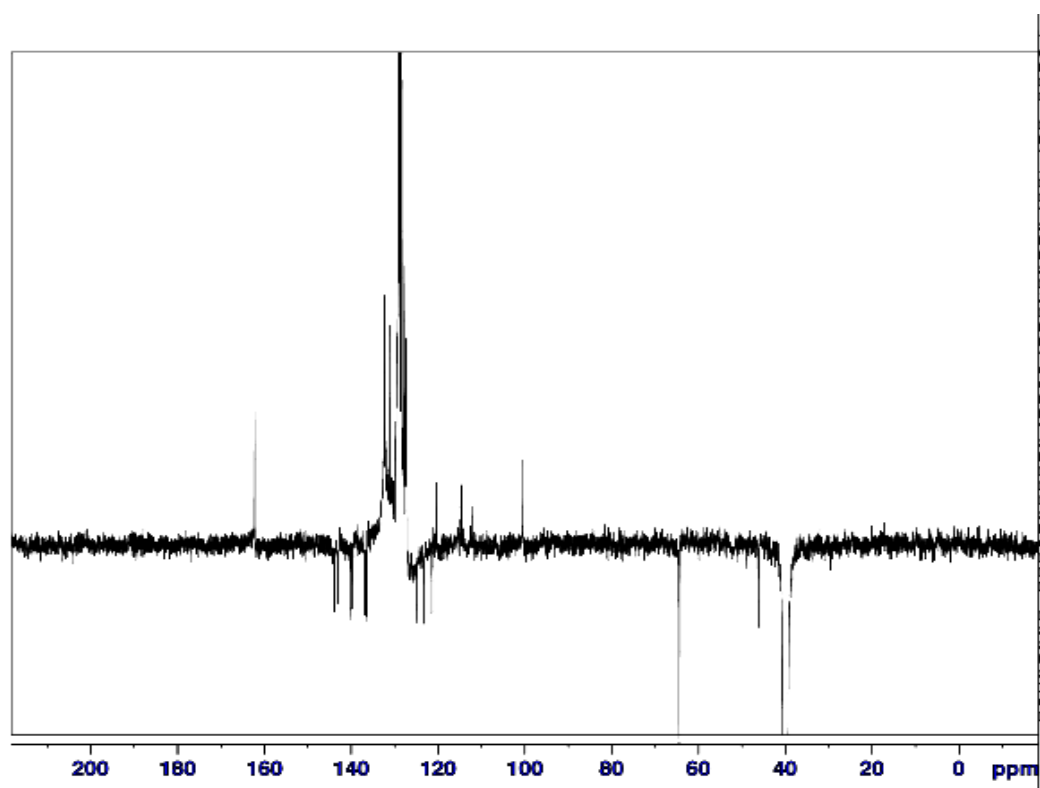

## Mass of compound 12

RT: 3.08 - 3.56 SM: 15G

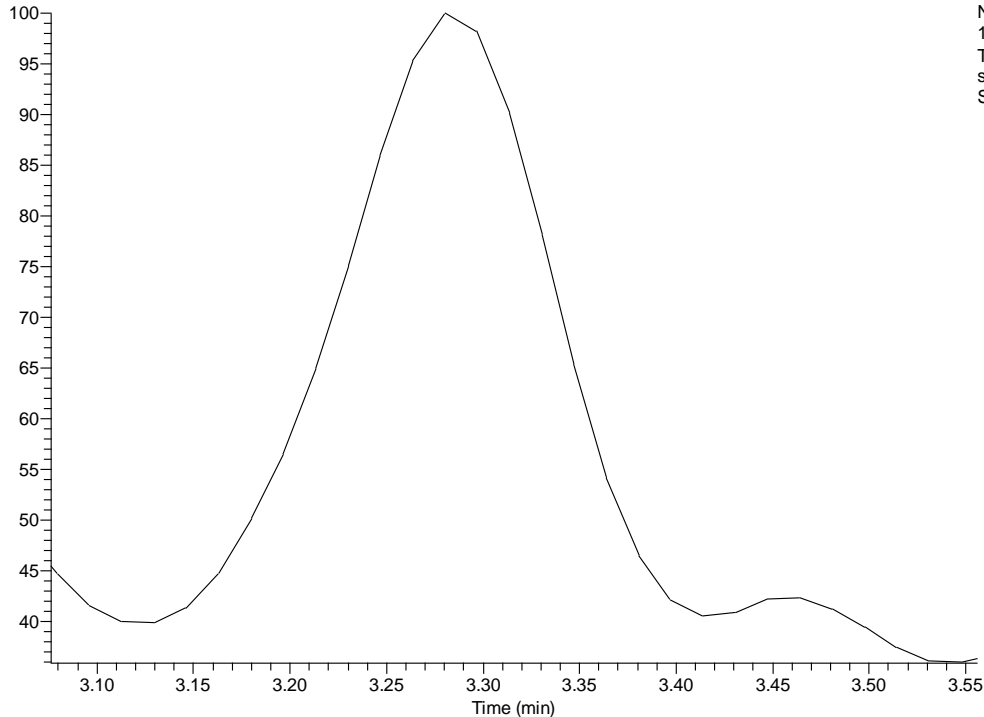

NL:  
1.26E4  
TIC MS  
samira0na  
SHAT-10

samira0naSHAT-10 #160 RT: 2.69 AV: 1 SB: 2 3.92, 3.92 NL: 4.77E2  
T: {0,0} + c EI Full ms [40.00-1000.00]

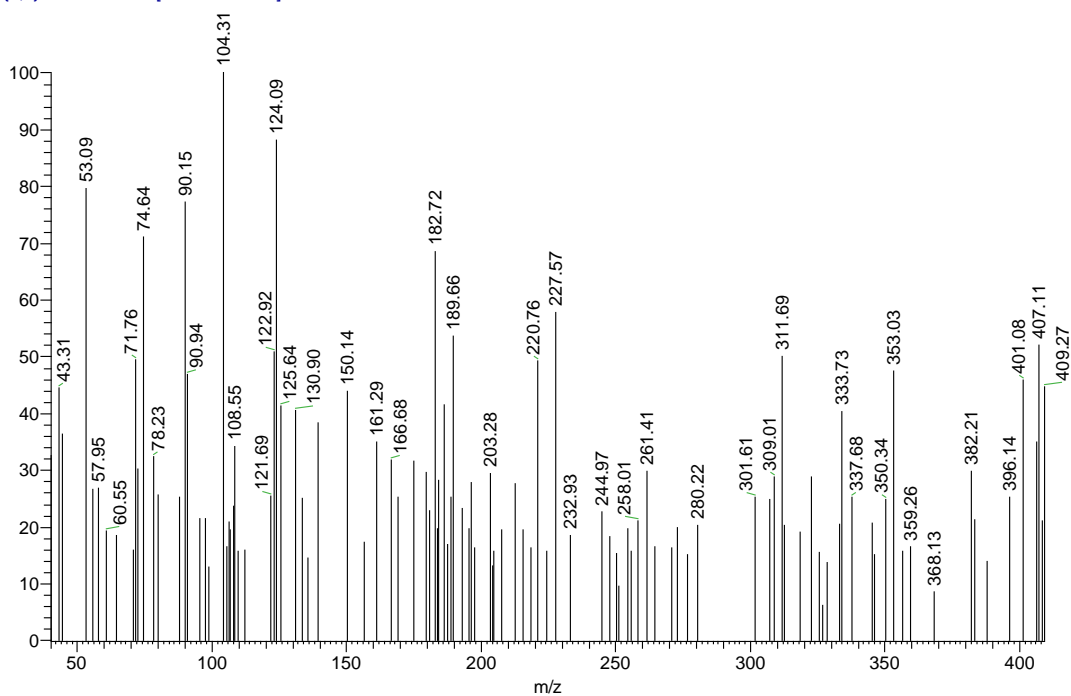

# <sup>1</sup>H NMR of compound 13

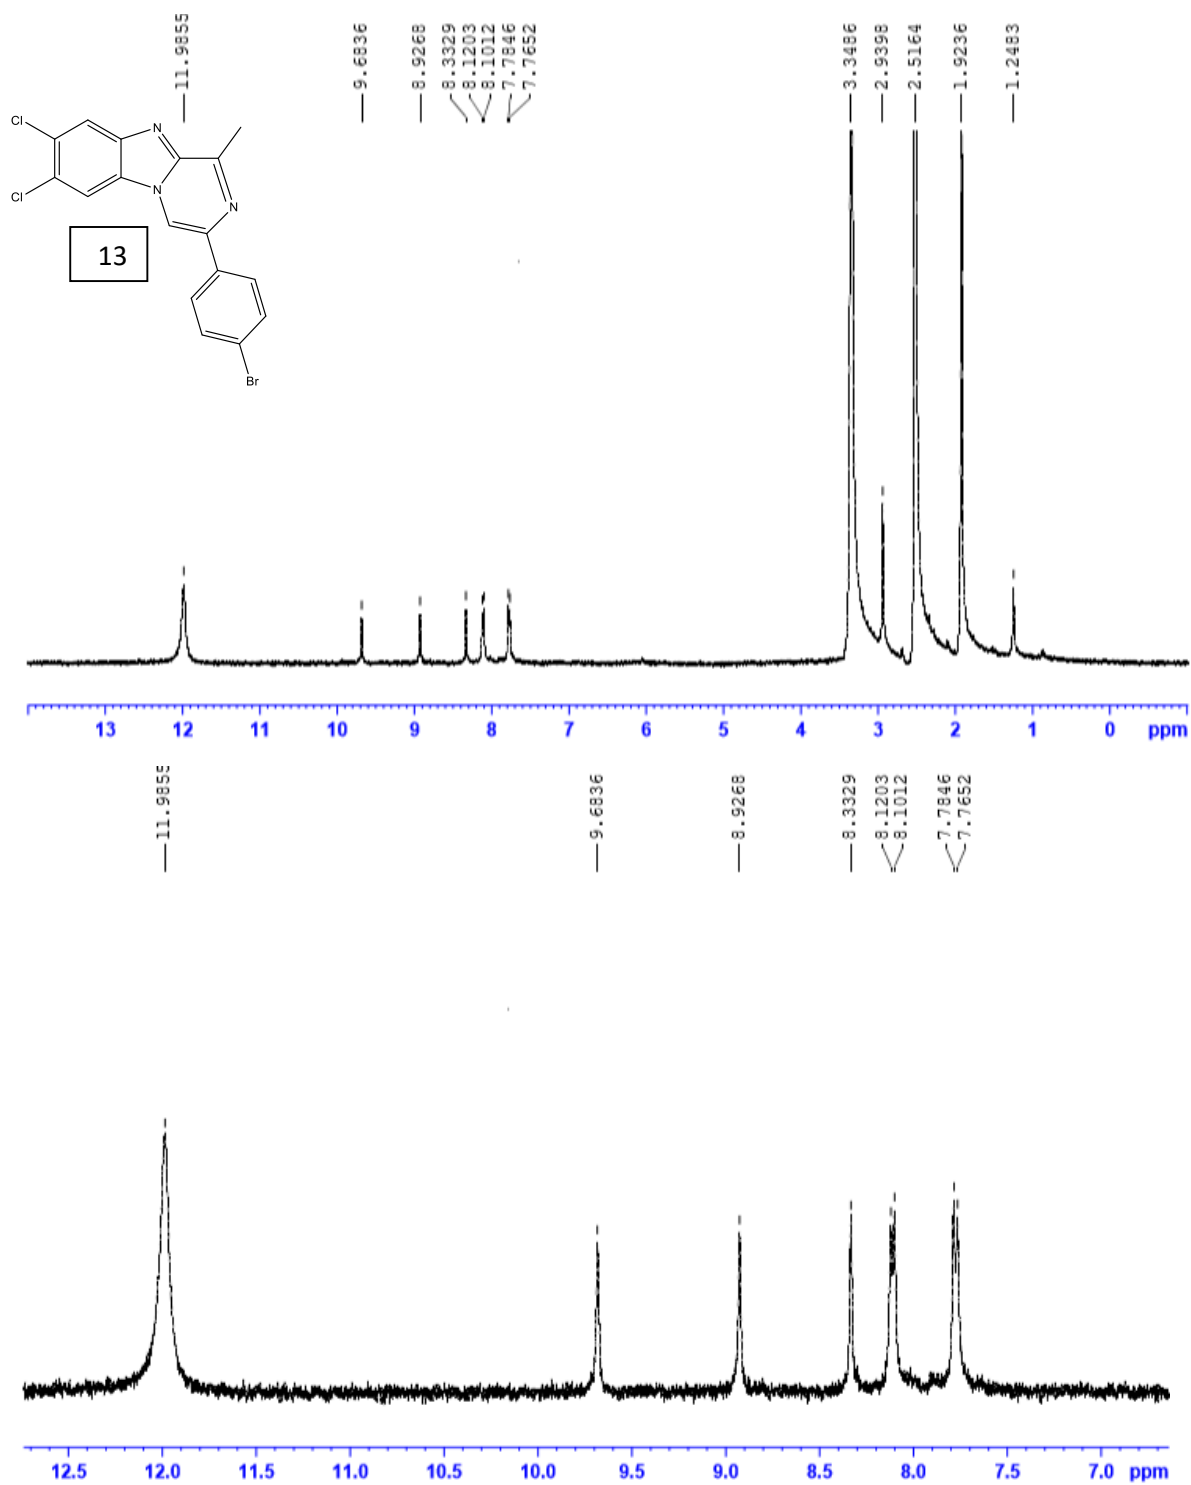

## Mass of compound 13

RT: 1.96 - 3.67 SM: 15G

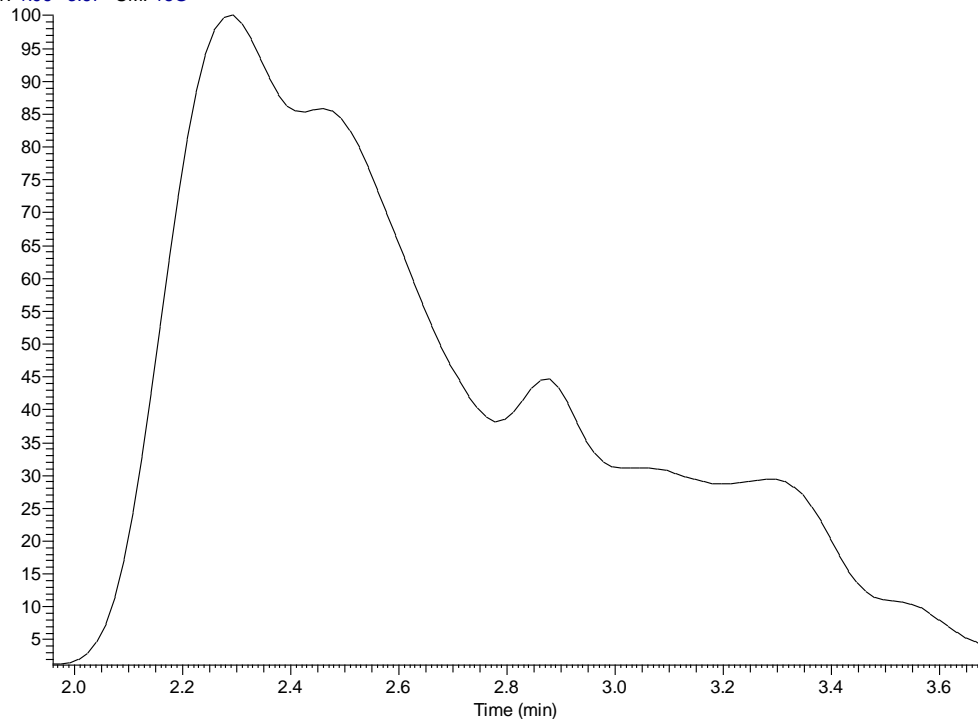

NL:  
4.77E5  
TIC MS  
samira-  
nashat-7

samira-nashat-7 #149 RT: 2.51 AV: 1 SB: 2 4.45, 4.45 NL: 2.56E3  
T: {0,0} + c EI Full ms [40.00-1000.00]

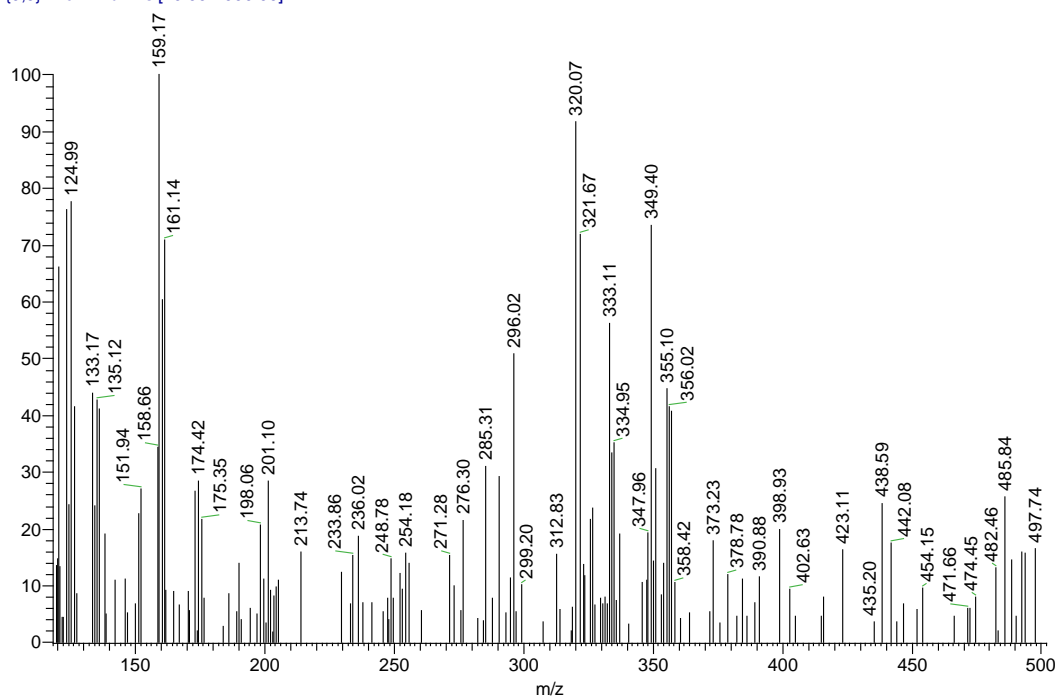

### $^1\text{H}$ NMR of compound 14

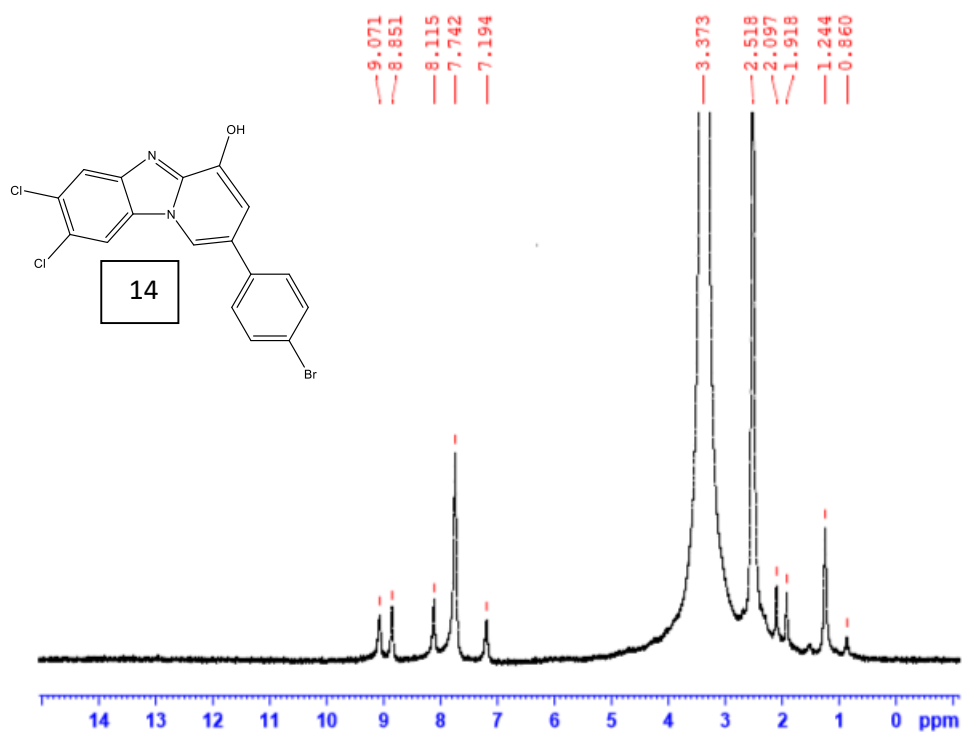

### IR of compound 14

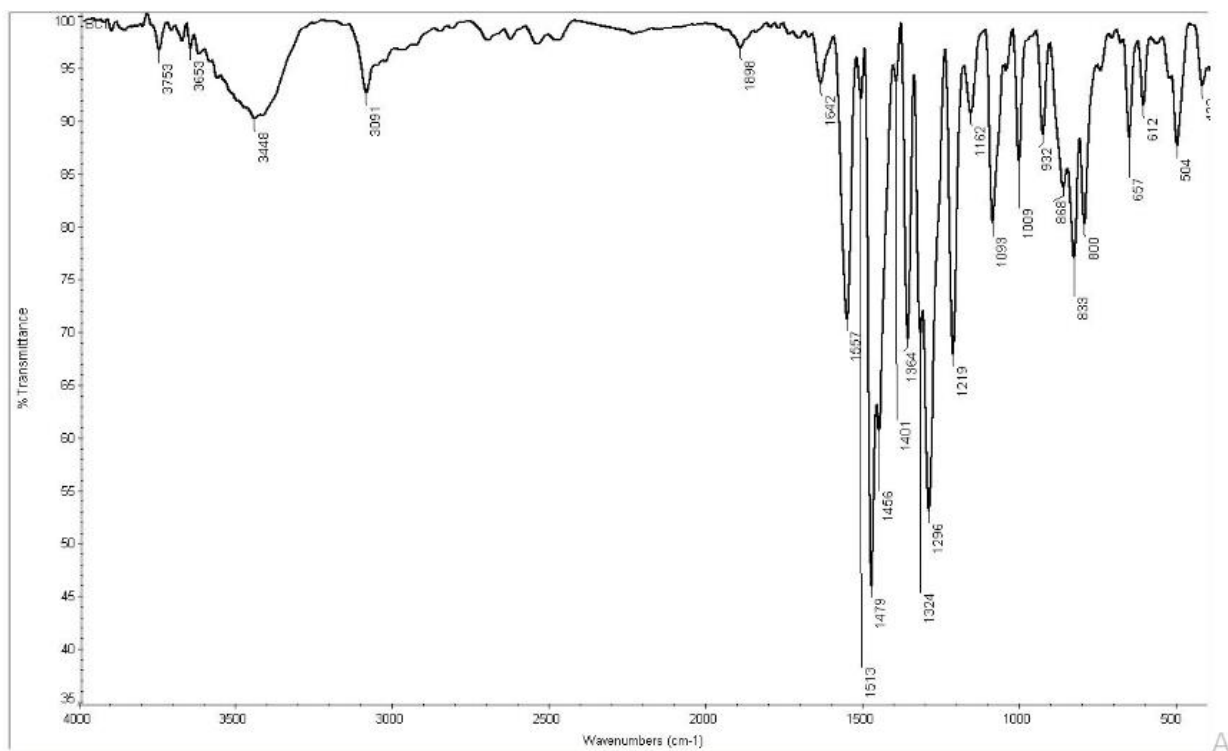

## Mass of compound 14

RT: 1.66 - 3.15 SM: 15G

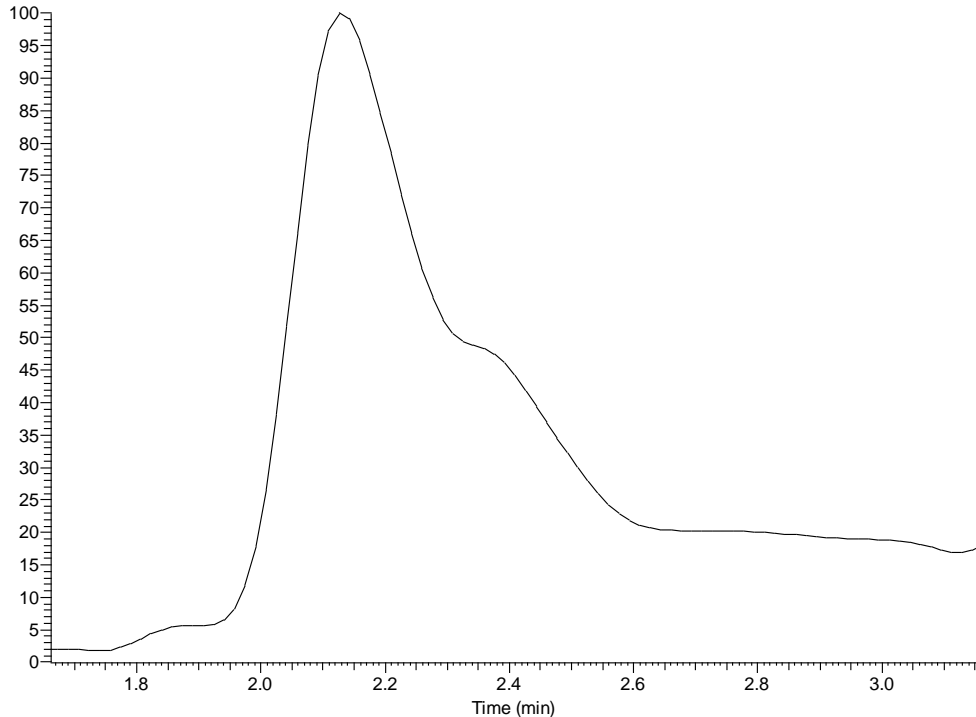

NL:  
5.10E5  
TIC MS  
samira-  
nashat-8

samira-nashat-8 #250 RT: 4.20 AV: 1 SB: 2 4.45, 4.45 NL: 2.19E3  
T: {0,0} + c EI Full ms [40.00-1000.00]

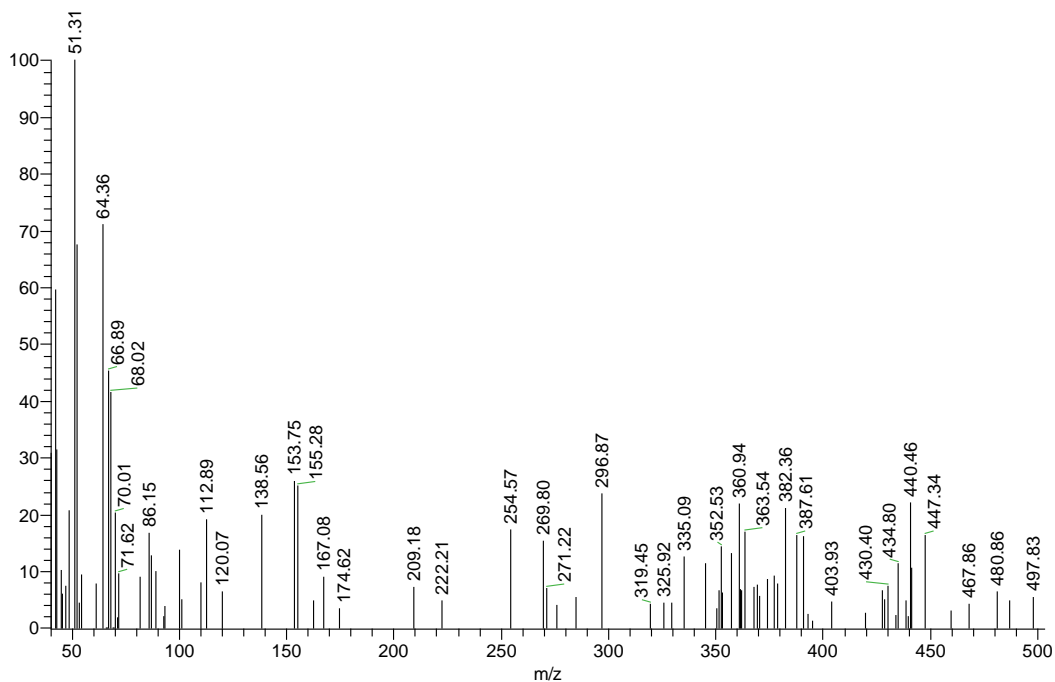

|                     |                                 |                     |            |
|---------------------|---------------------------------|---------------------|------------|
| : Dr.Samira Nashaat | email: Samiranashaat2@gmail.com | mob. 01011509651    | Researcher |
|                     |                                 | : EGFR enzyme assay | Assay      |
|                     |                                 | : 05 compounds.     | Samples    |
|                     |                                 | : ---               | Cell line  |
|                     |                                 | : ---               | Reference  |
|                     |                                 | : 28/06/2020        | Date       |

## Lab Report

| ser | Compound    |        | Results    |
|-----|-------------|--------|------------|
|     | code        | MW     | pin-1      |
|     |             | g/mol  | IC50<br>nM |
| 1   | 2           | 372.25 | 0.646±0.03 |
| 2   | 5A          | 362.29 | 2.019±0.1  |
| 3   | 9           | 497.22 | 1.106±0.06 |
| 4   | 15          | 440.62 | 3.609±0.16 |
| 5   | 28          | 324.87 | 0.617±0.03 |
| 6   | 5B          | 375.25 | 0.76±0.04  |
| *** | Tannic acid | 1701   | 0.535±0.02 |



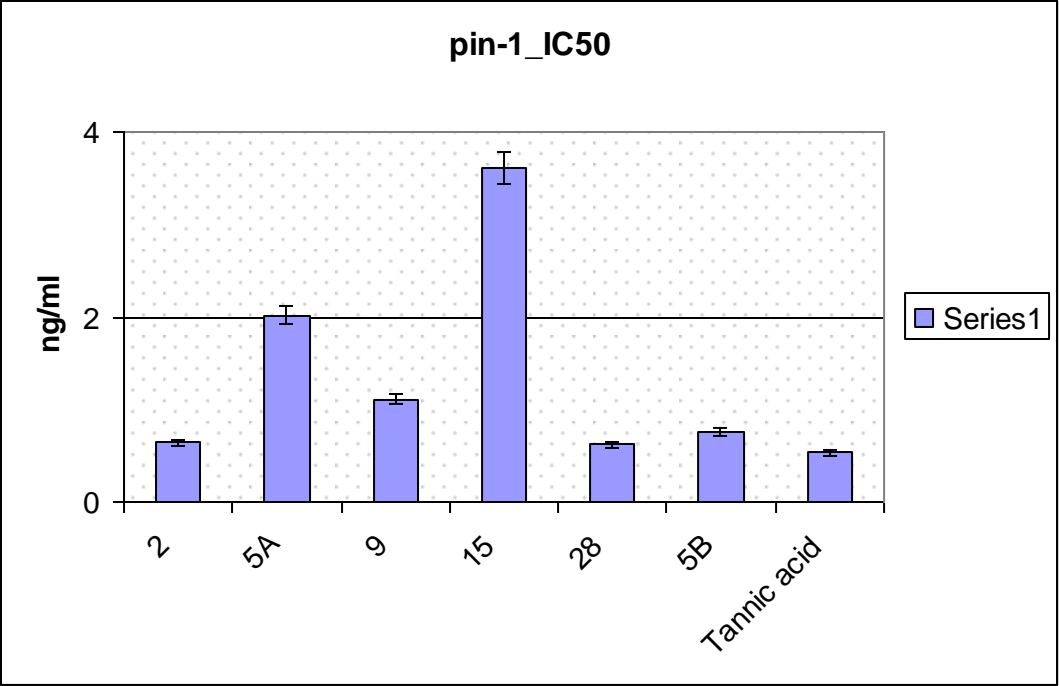

## Detailed results

pin-1

| code                                                                                | IC50 | conc       | log      | %inh  | T2 | T1 | ΔT | RFU2 | RFU1 | ΔRFU | slope | K.Activity | EC  |
|-------------------------------------------------------------------------------------|------|------------|----------|-------|----|----|----|------|------|------|-------|------------|-----|
| 2                                                                                   |      | 100        | 2        | 85.21 | 30 | 0  | 30 | 288  | 0    | 288  | 64.9  | 17.7504    | 120 |
| 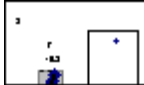   |      | 10         | 1        | 66.97 | 30 | 0  | 30 | 643  | 0    | 643  | 64.9  | 39.6302    | 120 |
|                                                                                     |      | 1          | 0        | 51.1  | 30 | 0  | 30 | 952  | 0    | 952  | 64.9  | 58.6749    | 120 |
|                                                                                     |      | 0.1        | -1       | 39.19 | 30 | 0  | 30 | 1184 | 0    | 1184 | 64.9  | 72.9738    | 120 |
|                                                                                     | EC   |            |          | 0     | 30 | 0  | 30 | 1947 | 0    | 1947 | 64.9  | 120        | 120 |
| code                                                                                | IC50 | conc.ng/ml | log conc | %inh  | T2 | T1 | ΔT | RFU2 | RFU1 | ΔRFU | slope | K.Activity | EC  |
| 5A                                                                                  |      | 100        | 2        | 84.8  | 30 | 0  | 30 | 296  | 0    | 296  | 64.9  | 18.2435    | 120 |
|  |      | 10         | 1        | 55.21 | 30 | 0  | 30 | 872  | 0    | 872  | 64.9  | 53.7442    | 120 |
|                                                                                     |      | 1          | 0        | 43.76 | 30 | 0  | 30 | 1095 | 0    | 1095 | 64.9  | 67.4884    | 120 |
|                                                                                     |      | 0.1        | -1       | 29.94 | 30 | 0  | 30 | 1364 | 0    | 1364 | 64.9  | 84.0678    | 120 |
|                                                                                     | EC   |            |          | 0     | 30 | 0  | 30 | 1947 | 0    | 1947 | 64.9  | 120        | 120 |
| code                                                                                | IC50 | conc.ng/ml | log conc | %inh  | T2 | T1 | ΔT | RFU2 | RFU1 | ΔRFU | slope | K.Activity | EC  |
| 9                                                                                   |      | 100        | 2        | 87.52 | 30 | 0  | 30 | 243  | 0    | 243  | 64.9  | 14.9769    | 120 |
|  |      | 10         | 1        | 69.49 | 30 | 0  | 30 | 594  | 0    | 594  | 64.9  | 36.6102    | 120 |
|                                                                                     |      | 1          | 0        | 42.17 | 30 | 0  | 30 | 1126 | 0    | 1126 | 64.9  | 69.3991    | 120 |
|                                                                                     |      | 0.1        | -1       | 34.72 | 30 | 0  | 30 | 1271 | 0    | 1271 | 64.9  | 78.3359    | 120 |
|                                                                                     | EC   |            |          | 0     | 30 | 0  | 30 | 1947 | 0    | 1947 | 64.9  | 120        | 120 |

| code                                                                              | IC50 | conc.ng/ml | log conc | %inh  | T2 | T1 | ΔT | RFU2 | RFU1 | ΔRFU | slope | K.Activity | EC  |
|-----------------------------------------------------------------------------------|------|------------|----------|-------|----|----|----|------|------|------|-------|------------|-----|
| 15                                                                                |      | 100        | 2        | 82.49 | 30 | 0  | 30 | 341  | 0    | 341  | 64.9  | 21.0169    | 120 |
|  |      | 10         | 1        | 54.9  | 30 | 0  | 30 | 878  | 0    | 878  | 64.9  | 54.114     | 120 |
|                                                                                   |      | 1          | 0        | 34.36 | 30 | 0  | 30 | 1278 | 0    | 1278 | 64.9  | 78.7673    | 120 |
|                                                                                   |      | 0.1        | -1       | 23.73 | 30 | 0  | 30 | 1485 | 0    | 1485 | 64.9  | 91.5254    | 120 |
|                                                                                   | EC   |            |          | 0     | 30 | 0  | 30 | 1947 | 0    | 1947 | 64.9  | 120        | 120 |

| code                                                                               | IC50 | conc.ng/ml | log conc | %inh  | T2 | T1 | ΔT | RFU2 | RFU1 | ΔRFU | slope | K.Activity | EC  |
|------------------------------------------------------------------------------------|------|------------|----------|-------|----|----|----|------|------|------|-------|------------|-----|
| 28                                                                                 |      | 100        | 2        | 86.7  | 30 | 0  | 30 | 259  | 0    | 259  | 64.9  | 15.963     | 120 |
|  |      | 10         | 1        | 66.97 | 30 | 0  | 30 | 643  | 0    | 643  | 64.9  | 39.6302    | 120 |
|                                                                                    |      | 1          | 0        | 50.33 | 30 | 0  | 30 | 967  | 0    | 967  | 64.9  | 59.5994    | 120 |
|                                                                                    |      | 0.1        | -1       | 40.27 | 30 | 0  | 30 | 1163 | 0    | 1163 | 64.9  | 71.6795    | 120 |
|                                                                                    | EC   |            |          | 0     | 30 | 0  | 30 | 1947 | 0    | 1947 | 64.9  | 120        | 120 |

| code                                                                                | IC50 | conc.ng/ml | log conc | %inh  | T2 | T1 | ΔT | RFU2 | RFU1 | ΔRFU | slope | K.Activity | EC  |
|-------------------------------------------------------------------------------------|------|------------|----------|-------|----|----|----|------|------|------|-------|------------|-----|
| Tannic acid                                                                         |      | 100        | 2        | 86.03 | 30 | 0  | 30 | 272  | 0    | 272  | 64.9  | 16.7643    | 120 |
| 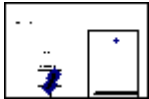 |      | 10         | 1        | 70.01 | 30 | 0  | 30 | 584  | 0    | 584  | 64.9  | 35.9938    | 120 |
|                                                                                     |      | 1          | 0        | 52.18 | 30 | 0  | 30 | 931  | 0    | 931  | 64.9  | 57.3806    | 120 |
|                                                                                     |      | 0.1        | -1       | 39.96 | 30 | 0  | 30 | 1169 | 0    | 1169 | 64.9  | 72.0493    | 120 |
|                                                                                     | EC   |            |          | 0     | 30 | 0  | 30 | 1947 | 0    | 1947 | 64.9  | 120        | 120 |

| code | IC50                                                                              | conc.ng/ml | log conc | %inh | T2 | T1 | ΔT | RFU2 | RFU1 | ΔRFU | slope | K.Activity | EC  |
|------|-----------------------------------------------------------------------------------|------------|----------|------|----|----|----|------|------|------|-------|------------|-----|
| 5B   |                                                                                   | 100        | 2        | 84.8 | 30 | 0  | 30 | 296  | 0    | 296  | 64.9  | 18.2435    | 120 |
|      |  |            |          | 67.3 |    |    |    |      |      |      |       |            |     |
|      |                                                                                   | 10         | 1        | 9    | 30 | 0  | 30 | 635  | 0    | 635  | 64.9  | 39.1371    | 120 |
|      |                                                                                   | 1          | 0        | 49.1 | 30 | 0  | 30 | 991  | 0    | 991  | 64.9  | 61.0786    | 120 |
|      |                                                                                   | 0.1        | -1       | 38.0 | 30 | 0  | 30 | 1207 | 0    | 1207 | 64.9  | 74.3914    | 120 |
| EC   |                                                                                   |            |          | 0    | 30 | 0  | 30 | 1947 | 0    | 1947 | 64.9  | 120        | 120 |

|             |                        |
|-------------|------------------------|
| 2           | $y = 15.393x + 52.922$ |
| 5A          | $y = 17.601x + 44.628$ |
| 9           | $y = 18.572x + 49.188$ |
| 15          | $y = 19.682x + 39.029$ |
| 28          | $y = 15.593x + 53.272$ |
| Tannic acid | $y = 15.603x + 54.242$ |



Supplement: s1 [file s1]
